# 1 Genetic diversity of local and introduced cassava 2 germplasm in Burundi using DArTseq molecular 3 analyses

4 Niyonzima Pierre<sup>1,2,\*</sup>, Lydia Nanjala Wamalwa<sup>1</sup>, William Maina Muiuru<sup>1</sup>, Bigirimana Simon<sup>2</sup>, Edward  
5 Kanju<sup>3</sup>, Morag Elizabeth Ferguson<sup>4</sup>, Malu Muia Ndavi<sup>5</sup> and Silver Tumwegamire<sup>6</sup>

6  
7 <sup>1</sup>Department of Plant Science and Crop Protection, University of Nairobi, P.O. Box 29053-00625,  
8 Nairobi, Kenya

9 <sup>2</sup>Institut des Sciences Agronomiques du Burundi (ISABU), P.O. Box 795, Bujumbura, Burundi

10 <sup>3</sup>International Institute of Tropical Agriculture (IITA), P.O. Box 7878, Kampala, Uganda

11 <sup>4</sup>International Institute of Tropical Agriculture (IITA), P.O. Box 30709, Nairobi, Kenya

12 <sup>5</sup>International Fund for Agriculture Development (IFAD), Rome, Italy

13 <sup>6</sup>International Institute of Tropical Agriculture (IITA), P.O. Box 1269, Kigali, Rwanda

14

15 \*Corresponding author: [pierreniyonzima@ymail.com](mailto:pierreniyonzima@ymail.com); [pierreniyonzima2014@gmail.com](mailto:pierreniyonzima2014@gmail.com)

17

## 18 Abstract

19 In Burundi, most of small-scale farmers still grow traditional cassava landraces that are  
20 adapted to local conditions and have been selected for consumer preferred attributes. They  
21 tend to be susceptible, in varying degrees, to devastating cassava viral diseases such as  
22 Cassava Brown Steak Disease (CBSD) and Cassava Mosaic Disease (CMD) with production  
23 annual losses of US\$1 billion annually. For long term resistance to the disease, several  
24 breeding strategies have been proposed. A sound basis for a breeding program is to  
25 understand the genetic diversity of both landraces and elite introduced breeding cultivars.  
26 This will also assist in efforts to conserve landraces ahead of the broad distribution of  
27 improved varieties which have the possibility of replacing landraces. Our study aimed at

28 determining the genetic diversity and relationships of local landraces and introduced elite  
29 germplasm using morphological and simple nucleotide polymorphism (SNP) markers as  
30 well as identifying a core set of germplasm from the local varieties to be used in the cassava  
31 breeding program. A total of 118 cultivars were characterized for morphological trait  
32 variation based on leaf, stem and root traits, and genetic variation using SNP markers.  
33 Results of morphological characterization based on Ward's Method revealed three main  
34 clusters and five accessions sharing similar characteristics. Molecular characterization  
35 identified over 18,000 SNPs and six main clusters and three pairs of duplicates which  
36 should be pooled together as one cultivar to avoid redundancy. Results of population  
37 genetic analysis showed low genetic distance between populations and between local  
38 landraces and elite germplasm. Accessions that shared similar morphological traits were  
39 divergent at the molecular level indicating that clustering using morphological traits was  
40 inconsistent. Despite the variabilities found within the collection, it was observed that  
41 cassava germplasm in Burundi have a narrow genetic base.

42 **Key words:** Cassava, Diversity Array Technology (DART), Genetic diversity, SNP markers,  
43 Morphological traits, Morphological descriptors.

44

## 45 **Introduction**

46 Cassava was the most important staple crop in Burundi in 2019, with production of 2.41  
47 million tons followed by fruits, bananas, sweet potatoes and vegetables [1]. It is grown  
48 mainly by small scale farmers throughout low, medium and high-altitude areas for human  
49 consumption. The root crop is eaten in the form of "imikembe", "ubuswage" and processed  
50 into flour for 'ugali' while leaves are used as vegetables or sauce [2]. Production of cassava  
51 doubled between 2010 to 2013 [1]. but since then, there has been a steady reduction in  
52 production, mainly due to cassava brown streak disease (CBSD) and cassava mosaic disease

53 (CMD). This is exacerbated by a lack of improved resistant cassava cultivars and the  
54 continued use of local susceptible landraces. The need to determine the genetic composition  
55 of local landraces and enhance the frequency of resistance genes within the local gene pool  
56 is a priority.

57 Breeding approaches for clonally propagated crops include variety introduction,  
58 germplasm assembly and maintenance, clonal selection and hybridization [3]. Breeding  
59 methods of cassava are defined by its genetic variability, the mode of reproduction and the  
60 breeding objectives. Cassava is a highly heterozygous species and presents substantial  
61 segregation in the first generation progenies, that are then evaluated through phenotypic  
62 mass selection [4]. The methods developed for self-pollinating crops are applicable to  
63 cassava with some modifications because of its specific characteristics. There is no classic  
64 genetic improvement methods initiated for vegetative propagated crops [5]. The main  
65 genetic improvement methods used in cassava are the assembly of the germplasm and  
66 selection followed by hybridization among selected elite clones [3, 6]. The introduction of  
67 varieties and selection are the most important breeding methods used in most of African  
68 countries [7]. However, crossing followed by selection of superior genotypes in the  
69 segregating population is the most universal method employed in cassava genetic  
70 improvement.

71 However, agricultural genetic diversity is imperative to provide a robust food security  
72 systems able to adapt to pest, diseases and environmental stresses [8] as well as to make  
73 genetic gains in plant breeding. It allows breeders to develop superior cultivars adapted to  
74 changing climatic conditions to meet the user demands. Understanding genetic diversity of  
75 species is the basis for a breeding program and to develop strategies for germplasm  
76 collection, management, conservation and improvement for food security and sustainable  
77 agricultural development [9, 10, 11]. Genetic diversity studies have widely been done for

78 cassava using both morphological and molecular methods in other countries such as Brazil  
79 [[12](#)], Chad [[13](#)], Benin Republic [[14](#)], Nigeria [[15](#)] etc. but not Burundi.

80 Morphological markers are widely used to characterize cassava germplasm but it takes  
81 long to get results compared to use of molecular markers. The morphological markers have  
82 been used by [[14](#)] to study the genetic diversity and relationships among elite cassava  
83 cultivars in Benin and highlighted a significant diversity and the most discriminating  
84 morphological parameters within the germplasm.

85 Molecular markers have also been widely used for genetic diversity studies of cassava.  
86 Molecular marker associated with agronomic traits have contributed significantly in marker  
87 assisted cassava breeding programs [[16](#)]. De Souza [[16](#)] also reported the identification of  
88 Simple Sequence Repeat (SSR) and Amplified Fragment Length Polymorphisms (AFLP)  
89 markers linked to the CMD-resistance gene in cassava landraces and Random Amplified  
90 Polymorphic DNAs (RAPD) markers linked to resistance to anthracnose. SSR markers were  
91 developed and utilized to construct the genetic linkage map of cassava [[17](#)] and evaluate the  
92 genetic diversity of cassava [[16](#), [18](#), [19](#)]. The first genetic linkage map of cassava was  
93 constructed from F1 intra-specific cross using SSR, Restriction Fragment Length  
94 Polymorphisms (RFLP) and RAPD [[17](#)]. The frequency and number of alleles per SSR  
95 marker in the Puerto Rican cassava collection were determined [[20](#)]. RFLP, AFLP and RAPD  
96 markers were used to analyze the genetic diversity of cassava [[21](#), [22](#), [23](#)]. Furthermore,  
97 study on the genetic diversity and relationships within cassava germplasm using SNPs  
98 markers, was done by [[24](#)]. The utilization of SNPs has gained popularity in recent years  
99 due to their abundance, ubiquitous nature, polymorphism and amenability to automation  
100 [[25](#)]. In cassava, SNPs have been used for genetic linkage mapping [[26](#), [27](#)], genome-wide  
101 association studies [[15](#)] and genetic diversity assessments [[28](#)]. Diversity Arrays  
102 Technology (DArT) markers for cassava were developed and reported as a tool for

103 genotyping large germplasm collections [29] but this has not been used on Burundian  
104 cassava genotypes. DArT performs well in polyploid species and does not require any  
105 existing DNA-sequence information and can be used with little resources required for SNP  
106 platforms [30]. Thus, it is a sequence-independent genotyping method designed to detect  
107 genetic variation at several hundred genomic loci in parallel without relying on sequence  
108 information.

109 Our study sought to characterize and determine relationships of cassava local landraces and  
110 introduced elite genotypes, as well as identifying any putative duplicates, using  
111 morphological and molecular markers.

112

## 113 **Materials and methods**

### 114 **Germplasm collection and establishment**

115 One hundred local landraces of cassava were collected from four agro-ecological zones in  
116 Burundi, namely Imbo plain, Mumirwa slopes, east and north depressions, and Central  
117 plateau (Table 1), selected on the basis of their importance in growing cassava. The  
118 identification of cassava landraces was done in farmers' fields jointly by farmers and  
119 investigators based on a short discussion. The landraces were recorded under the name as  
120 given by the farmers. Once collected, the landraces were planted in field gene banks at two  
121 sites (Moso and Murongwe research stations) representing two major cassava growing  
122 regions in Burundi for morphological and molecular characterization. Eighteen elite cassava  
123 genotypes earlier introduced to Burundi (Table 2) were also planted at the same sites.  
124 Single row plots with five plants spaced one meter between and within rows were used for  
125 each genotype in the trial. No fertilizer or irrigation was provided and weeds were managed  
126 throughout the growing period.

127 **Table 1** Cassava landraces and their region of origin within Burundi

| Name of accession   | Agro-ecological zone | Name of accession      | Agro-ecological zone | Name of accession  | Agro-ecological zone |
|---------------------|----------------------|------------------------|----------------------|--------------------|----------------------|
| Nakarasi ya congo   | 1                    | Gatarina               | 3                    | Mpamba             | 4                    |
| Nakarasi y'ikirundi | 1                    | Serereka               | 3                    | Mabare             | 4                    |
| Gitamisi_1          | 1                    | Bugiga annonciate_1    | 3                    | Imiduga_1          | 4                    |
| Muzinda             | 1                    | Yongwe_2               | 3                    | Tabika             | 4                    |
| Kwezikumwe          | 1                    | Gitikatika             | 3                    | Yongwe ederi       | 4                    |
| Rumonge             | 1                    | Gifunzo caritsa_1      | 3                    | Umukurajoro        | 4                    |
| Mbubute             | 1                    | Gifunzo caritsa_2      | 3                    | Rukokora           | 4                    |
| Yagata              | 1                    | Fyiroko                | 3                    | Kinazi dorothee1   | 4                    |
| Niga                | 1                    | Munebwe                | 3                    | Gasu               | 4                    |
| Ibigororoka         | 1                    | Ndoha                  | 3                    | Inagitembe         | 4                    |
| Maguruyinkware_1    | 1                    | Maguruyinkware_2       | 3                    | Umutuburano        | 4                    |
| Mwarabu             | 1                    | Rumarampunu            | 3                    | Gitamisi_2         | 4                    |
| Rushishwa           | 1                    | Imikabika              | 3                    | Rubona_2           | 4                    |
| Sosomasi            | 1                    | Hanyesi                | 3                    | Nakarasi_1         | 4                    |
| Myezisita           | 1                    | Rubona_1               | 3                    | Surupiya           | 4                    |
| Zegura              | 1                    | Bwome devote1          | 3                    | Sogota             | 4                    |
| Igipila             | 1                    | Umuyobera              | 4                    | Nabuseri           | 4                    |
| Igikoshi            | 1                    | Gasahira               | 4                    | Imirundi           | 4                    |
| Nakarasi_2          | 1                    | Mbwayasaze             | 4                    | Imizariya          | 4                    |
| Solange             | 2                    | Kidihe_1               | 4                    | Maguruyinkware_3   | 4                    |
| Yongwe_1            | 2                    | Bunwa                  | 4                    | Umutakabumba       | 4                    |
| Kibembe_1           | 2                    | Inarubono              | 4                    | Mugerera Yvonne_1  | 4                    |
| Criolina            | 2                    | Ntunduguru             | 4                    | Mugerera Yvonne_2  | 4                    |
| Matara              | 2                    | Kigoma                 | 4                    | Kidihe_2           | 4                    |
| Sisiriya            | 2                    | Imijumbura             | 4                    | Nyawera            | 4                    |
| Ruvuna              | 2                    | Nyabisindu anastasio_1 | 4                    | Nyamugari sophie_1 | 4                    |
| Butoke              | 2                    | Kabumbe                | 4                    | Mukecuru           | 4                    |
| Kiganda             | 2                    | Gasasa                 | 4                    | Fundiko            | 4                    |
| Ntabahungu          | 2                    | Yongwe_3               | 4                    | Umuhendangurube    | 4                    |
| Kibembe_2           | 2                    | Mutsindekwiburi        | 4                    | Sagarara           | 4                    |
| Munengera           | 3                    | Murozi                 | 4                    | Imiduga_2          | 4                    |
| Mwotsi_2            | 3                    | Umusimbaruzi           | 4                    | Mwotsi_1           | 4                    |
| Berita              | 3                    | Bukarasi               | 4                    | Kavyiro            | 4                    |
| Ntegagakoko         | 3                    | -                      | -                    | -                  | -                    |

129 1 = Imbo plain, 2 = Mumirwa slopes, 3 = East and north depressions, 4 = Central plateau

130 **Table 2** Introduced elite germplasm in Burundi and their country of origin

| Variety name | Country of origin |
|--------------|-------------------|
| KBH2002/066  | Tanzania          |
| Pwani        | Tanzania          |
| Mkumba       | Tanzania          |
| KBH2006/026  | Tanzania          |
| Kizimbani    | Tanzania          |
| Kiroba       | Tanzania          |
| Albert       | Tanzania          |
| Okhumelela   | Mozambique        |
| Orera        | Mozambique        |
| Eyope        | Mozambique        |
| Tajirika     | Kenya             |

|             |         |
|-------------|---------|
| F10-30-R2   | Kenya   |
| Kibandameno | Kenya   |
| TZ 130      | Uganda  |
| Nase14      | Uganda  |
| Nase1       | Uganda  |
| Nase3       | Uganda  |
| MM96/5280   | Burundi |

---

131

132 **Morphological Characterization of Cassava Local Landraces and**  
133 **Introduced Elite Germplasm**

134 Seventeen qualitative agro-morphological traits were evaluated ([Table 3](#)) using cassava  
135 descriptors described by Fukuda *et al.* [[31](#)]. Data was collected at 3, 6, 9 and 12 months  
136 after planting (MAP) using 17 descriptors with score codes that varied between 0 and 10  
137 ([Table 3](#)). Color and pubescence on apical leaves were recorded earlier rather than later to  
138 avoid obscured traits due to damage by cassava green mites that normally infest cassava at  
139 later stages of plant growth. At 6 MAP, data on the shape of central leaf lobe and color of the  
140 leaf and petiole, and petiole orientation were recorded by taking a leaf from the mid-height  
141 stem position. At 9 MAP, data on prominence of foliar scars, color of stem cortex and color  
142 of stem exterior were recorded from the middle third of the plant. Color of stem cortex was  
143 visualized by shallow cut and peel back of the epidermis as described by Fukuda *et al.* [[31](#)].  
144 Distance between leaf scars was measured from the middle part of stem on the middle third  
145 of the plant, where the scars are not flat. Measurement was made along the stem and the  
146 distance was divided by the number of nodes in the measured section to obtain the mean  
147 internode length. Data on the stem's growth habit was recorded either as straight or zig-zag,  
148 and color of the end branches of the adult plant was observed on the top 20 cm of the plant.  
149 At 12 MAP, observations on color of root cortex, color of root-pulp, external color of storage

150 root and root taste were taken. Root cortex color and color of root-pulp were visualized by  
 151 removing the skin of the root and by transversal cutting of the root.

152 **Table 3** Qualitative traits used to characterize 118 cassava genotypes

| Trait observed                       | Trait acronym | Sore code                                                                                                                                                                                               | Data entry |
|--------------------------------------|---------------|---------------------------------------------------------------------------------------------------------------------------------------------------------------------------------------------------------|------------|
| Color of apical leaves               | CAL           | 3 = light green; 5 = dark green; 7 = purplish green; 9 = purple                                                                                                                                         | 3 MAP      |
| Pubescence on apical leaves          | PAL           | 0 = absent, 1 = present                                                                                                                                                                                 | 3 MAP      |
| Shape of central leaflet             | SCL           | 1 = ovoid; 2 = elliptical-lanceolate; 3 = obovate-lanceolate; 4 = oblong-lanceolate; 5 = lanceolate; 6 = linear; 7 = pandurate; 8 = linear-pyramidal; 9 = linear-pandurate; 10 = linear-hostatilobalate | 6 MAP      |
| Petiole color                        | PC            | 1 = yellowish-green, 2 = green, 3 = reddish-green, 5 = greenish-red, 7 = red, 9 = purple                                                                                                                | 6 MAP      |
| Leaf color                           | LC            | 3 = light green; 5 = dark green; 7 = purple green; 9 = purple                                                                                                                                           | 6 MAP      |
| Petiole orientation                  | PO            | 1 = inclined upwards, 3 = horizontal, 5 = inclined downwards, 7 = irregular                                                                                                                             | 6 MAP      |
| Prominence of foliar scars           | PFS           | 3 = semi-prominent, 5 = prominent                                                                                                                                                                       | 9 MAP      |
| Color of stem cortex                 | CSC           | 1 = orange, 2 = light green, 3 = dark green                                                                                                                                                             | 9 MAP      |
| Color of stem epidermis              | CSEp          | 1 = cream, 2 = light brown, 3 = dark brown, 4 = orange                                                                                                                                                  | 9 MAP      |
| Color of stem exterior               | CSEx          | 3 = orange, 4 = green-yellowish, 5 = golden, 6 = light brown, 7 = silver, 8 = gray, 9 = dark brown                                                                                                      | 9 MAP      |
| Distance between leaf cars           | DBLS          | 3 = short ( $\leq 8$ cm), 5 = medium (8–15 cm), 7 = long ( $\geq 15$ cm)                                                                                                                                | 9 MAP      |
| Growth habit of stem                 | GHS           | 1 = Straight, 2 = Zig-zag                                                                                                                                                                               | 9 MAP      |
| Color of end branches of adult plant | CEBAP         | 3 = Green, 5 = Green-purple, 7 = Purple                                                                                                                                                                 | 9 MAP      |
| Color of root cortex                 | CRC           | 1 = White or cream, 2 = Yellow, 3 = Pink, 4 = Purple                                                                                                                                                    | 12 MAP     |
| Color of root-pulp                   | CRP           | 1 = white; 2 = cream; 3 = yellow; 4 = orange; 5 = pink                                                                                                                                                  | 12 MAP     |
| External color of storage root       | ECSR          | 1 = white or cream; 2 = yellow; 3 = light brown; 4 = dark brown                                                                                                                                         | 12 MAP     |
| Root taste                           | RT            | 1 = Sweet, 2 = Intermediate, 3 = Bitter                                                                                                                                                                 | 12 MAP     |

153 MAP = Months after planting

154

## 155 **Molecular characterization of cassava local landraces and** 156 **introduced elite germplasm**

157 In terms of DNA extraction; four disks of approximately 5mm diameter were collected from  
 158 young fresh leaf samples. These were dried in an oven overnight at 45°C and shipped to  
 159 Intertek in Australia for DNA extraction, before being forwarded to Diversity Array  
 160 Technologies for genotyping using DArTseq. DNA quality and quantity were checked on a  
 161 0.8% agarose gel. Libraries were constructed at Diversity Arrays Technology in Canberra,  
 162 Australia according to DArTseq<sup>TM</sup> complexity reduction method through digestion of



163 genomic DNA and ligation of barcoded adapters [32]. DArT uses a genotyping by sequencing  
164 DArTseq™ technology, providing rapid, high quality and affordable genome profiling, even  
165 from the most complex polyploid genomes [32, 33]. SNP marker scoring was achieved using  
166 DArTsoft14 which is an in-house marker scoring pipeline based on algorithms [32]. Two  
167 types of DArTseq: SilicoDArT and SNP markers were both scored as binary markers for  
168 presence or absence (1 and 0 respectively).

169

## 170 **Data analyses**

171 Morphological data was analyzed using the Statistical Package for the Social Sciences (SPSS)  
172 software (IBM SPSS Statistics for Windows version 20.0, IBM Corp, Armonk, NY.).  
173 Dissimilarity matrix was used to determine the relationship among accessions. The  
174 structure of morphological variation was visualized using ascending hierarchical clustering  
175 (AHC) based on data and Ward's Method to plot a dendrogram [24, 13]. Morphological  
176 traits distribution was determined using Microsoft (MS) Excel (2016). Generated SNP data  
177 were cleaned in MS Excel by removing all genotypes with >5% missing data and  
178 monomorphic SNPs. Hamming's single distance between genotypes was calculated using  
179 KDCompute, Version 1.5.2 beta and hierarchical clustering done by Ward's method for  
180 dendrogram (<https://www.rdocumentation.org/packages/dartR>). Generated SNP data  
181 were imported into DartR and then filtered for repeatability, monomorphic loci, call rate  
182 per locus, single locus per sequence tag and call rate per individual [34]. To better identify  
183 putative duplicated genotypes and to determine cut-off, known duplicate cassava genotypes  
184 were included with the samples genotyped. To assess the population statistics, the  
185 observed heterozygosity ( $H_o$ ) was calculated using mean 'hobs' function and expected  
186 heterozygosity ( $H_e$ ) using Hs function in the R package 'Adegenet' [35, 36, 37]. The pair  
187 wise fixation index ( $F_{st}$ ) among populations was calculated using StAMPP package in R

188 (<https://www.rdocumentation.org/packages/dartR>) and the output value indicated  
189 existence or not of differentiation between populations where <15% indicate low  
190 differentiation,  $0.15 < F_{st} < 0.25$  indicate moderate differentiation and >25% indicate high  
191 differentiation [38]. Genetic relationships of landrace and introduced cassava genotypes  
192 were assessed by estimation of hamming distance between genotypes using dartR in  
193 KDCompute as described by Hoque et al. [39]. Single distance matrix was exported as a csv  
194 file and imported into DARwin v6.0.21 [40] to construct a dendrogram to estimate the  
195 genetic relationships.

196

## 197 **Results**

### 198 **Morphological traits of Cassava local landraces and Improved**

#### 199 **Elite Germplasm**

##### 200 **Leaf traits**

201 There was a diversity of color on apical leaves for the cassava genotypes. Most accessions  
202 (68%) had purplish green color as the dominant color for apical leaf (Fig 1) mostly  
203 dominated by landraces (64.4%) (Fig 2), and few of the elite germplasm (3.4%) (Fig 3).  
204 About 19% and 15% of the accessions had dark-green and purple apical leaf color,  
205 respectively. Less than 7% of the accessions had pubescence on apical leaves (Fig 1). The  
206 shape of the leaves also had variations where 50% of the accessions had elliptic-lanceolate  
207 as the dominant shape (Fig 1) and mostly among the landraces (44.1%) (Fig 2). Obovate  
208 lanceolate, pandurate, lanceolate-pandurate and linear-pyramidal leaf shapes were rare,  
209 and altogether observed in 6.8% of the accessions (Fig 2). The color of petioles varied  
210 among the accessions, where purple color was the most frequent (50%). Most landraces

211 had purple color (44.9%) compared to only 5.1% of the elite germplasm ([Fig 2-3](#))  
212 respectively. Other petiole colors were observed, including yellowish-green, green, green  
213 purple, purple yellow, red-green, and red ([Fig 1](#)). Dark green color (72.9%) ([Fig 1](#)) was the  
214 dominant leaf color observed in most accessions of which 68.6% were landraces ([Fig 2](#)).  
215 The most frequent petiole observed was horizontally oriented (56%) ([Fig 1](#)) and more so  
216 for landraces (52.5%) ([Fig 2](#)). Color of the end branches of adult plants was mostly greenish  
217 purple among accessions (47.5%) ([Fig 1](#)), which was the most frequent color among the  
218 landraces (39%) ([Fig 2](#)). However, green and purple colors were also observed among the  
219 accessions ([Fig 1](#)).

## 220 **Stem traits**

221 Most accessions (41.5%) had light green stem cortex color ([Fig 1](#)), mostly dominated by  
222 landraces (35.6%) ([Fig 2](#)) and a few (5.9%) by the elite germplasm ([Fig 3](#)). Dark green stem  
223 color was found on 27.1% of the 118 accessions ([Fig 1](#)). Epidermis color was diverse, where  
224 more than 56% accessions were dark brown ([Fig 1](#)) mostly landraces (32.2%) ([Fig 2](#)). The  
225 rest of the accessions (43%) had light brown stem epidermis. Color of stem exterior was  
226 mostly green yellow with 33.9% of the accessions ([Fig 1](#)) mostly landraces ([Fig 2](#)), followed  
227 by grey (27.1%) ([Fig 1](#)), also dominated by landraces ([Fig 2](#)). Silver color of stem exterior  
228 then followed at 21.2% ([Fig 1](#)) mostly landraces ([Fig 2](#)). Other stem exterior colors  
229 recorded were dark brown, orange and green colors ([Fig 1](#)).

230 Foliar scars were prominent among 78.8% of the accessions while 21.2% had semi  
231 prominent foliar scars. Accessions with prominent foliar scars were mostly landraces  
232 (65.2%) ([Fig 2](#)) while the elite germplasm with prominent foliar scars comprised only  
233 13.6%. The distance between leaf scars varied within the cassava accessions where 66%  
234 had medium distance (8–15 cm) ([Fig 1](#)) comprised mostly by landraces ([Fig 2](#)), 34% had

235 long ( $\geq 15$  cm) and short ( $\leq 8$  cm) distance. All the accessions had straight stem growth  
236 habit except one (Orera) that had the zigzag stem habit ([Fig 1](#)).

### 237 **Root traits**

238 Cream root cortex color was recorded among 85.7% of the accessions ([Fig 1](#)) and almost all  
239 the elite germplasm (14.4%) belonged to this group ([Fig 3](#)). Pink root cortex has been  
240 observed on some accessions ([Fig 1](#)). All the accessions had white pulp color except Solange  
241 that had yellowish root pulp ([Fig 1-2-3](#)). Dark brownish external storage root color was the  
242 most frequent (39.0%) among the accessions ([Fig 1](#)) mostly the landraces (31.4%) ([Fig 2](#)).  
243 Bitter taste was noted for 79.5% of the accessions ([Fig 1](#)), mainly among both the landraces  
244 ([Fig 2](#)) and the elite germplasm ([Fig 3](#)).

246 **Fig 1.** Morphological traits distribution among both landraces and elite germplasm with  
247 error bars indicating whether differences are statistically significant

248 **Fig 2.** Morphological traits distribution among the cassava landraces with error bars  
249 indicating whether differences are statistically significant

251 **Fig 3.** Morphological traits distribution among the elite germplasm with error bars  
252 indicating whether differences are statistically significant

253

## 254 **Hierarchical clustering of Cassava local landraces and Improved**

### 255 **Elite Germplasm**

256 Ascending hierarchical clustering analysis based on morphological traits and Ward's  
257 method showed three major clusters (I, II and III) ([Fig 4](#)) following the horizontal line at a  
258 dissimilarity level of 6. Cluster I containing 31 accessions (all local landraces) had two sub-  
259 clusters. Cluster II consisted of 26 accessions (3 sub-clusters) and was composed of local

260 landraces and elite genotypes. Sub-cluster III of cluster II consisted of five elite genotypes;  
261 Tajirika, Nase 1, Nase 3, KBH2002/066 and Orera, and two local landraces (Nakarasi and  
262 Igipila), sub-cluster II of 3 elite genotypes namely Kizimbani, Kiroba and Eyope while sub-  
263 cluster I consisted of 16 local landraces ([Fig 4](#)). Cluster III was the largest with two sub-  
264 clusters consisting of 51 local landraces and ten elite genotypes. Elite genotypes under this  
265 category were KBH2006/026, Okhumelela, MM96/5280, Nase14, F10-30-R2, TZ130, Albert,  
266 Mkumba, Kibandameno and Pwani ([Fig 4](#)).

267 **Fig 4.** Phenotypic classification of cassava accessions based on the Ward's method at a  
268 dissimilarity level of 6

269

## 270 **Genetic relationship among cassava genotypes using DArT**

### 271 **analyses**

272 Results from DartR analysis showed 72 unique genotypes, 39 genotypes presented similar  
273 SNP profile ([Fig 5](#)) following the cut off (green line) calculated from the distance matrix  
274 based on an average value of known duplicates. Putative duplicates accessions were  
275 grouped in 16 classes, each of them with different clones ([Fig 5](#)). Genotypic classification of  
276 accessions based on Ward's method showed six major clusters ([Fig 5](#)) at dissimilarity level  
277 of 1.0 (red line). Cluster I had two elite genotypes, Pwani and Mkumba alongside five known  
278 duplicate checks: Pwani\_2, Pwani\_3\_SB101, Mkumba\_1, Pwani\_1, Mkumba\_2\_SB102 ([Fig 5](#)).

279 Cluster II had nine genotypes consisting of four local (Nakarasi ya congo, Rumonge,  
280 Munembwe and Gitamisi) and five elite genotypes, namely KBH2006/026, Tajirika,  
281 KBH2002/066, Kizimbani and Okhumelela ([Fig 5](#)). Cluster II had five duplicates namely,  
282 Tajirika-2, KBH 2002/026/1, KBH 2002/026/2, Tajirika-5CP-Kephis and KBH 2002-066-  
283 SB103 ([Fig 5](#)). Cluster III and V consisted of eight and seven accessions, respectively, all  
284 local landraces. Cluster IV was composed of 58 accessions sub clustering into two mains

285 groups that were sub clustered in different subgroups showing many similarities ([Fig 5](#)).  
286 Cluster IV consisted of 50 local landraces and eight elite genotypes including Orera, F10-30-  
287 R2, Kibandameno, Albert, Okhumelela, MM96/5280, Nase 14 and TZ130 ([Fig 5](#)). Cluster VI  
288 consisted of 33 local landraces. Paired similar accessions that fell into this category were  
289 Igikoshi and Munengera, Sosomasi and Igipila, Mwotsi, Mwarabu and Mwzisita, Bunwa and  
290 Kigoma, Maguruyinkware-2 and Rumaramuntu, Ndoha and Imikabika, and Bugiga  
291 annociate 1 and Gifunzo caritas 2 ([Fig 5](#)).

293 **Fig 5.** Genotypic classification of accessions based on the Ward's method at dissimilarity  
294 level of 1.0 (red line), the green line determining the threshold for putative and known  
295 duplicates

## 296

### 297 **Assessment of the population statistics of the genotypes**

298 Assessment was done within and between populations to determine existence of any  
299 relationships. The output values of calculated pair wise fixation index (Fst) among all  
300 populations were <15% indicating low differences between populations ([Table 4](#), [Fig 6](#)).  
301 Results showed pair wise fixation index of 0.071, 0.095, 0.073 and 0.083 between elite  
302 genotypes and local landraces of Imbo plain, Mumirwa slopes, North east depressions and  
303 Central plateau, respectively, that showed little variation ([Table 4](#)). Between local landraces  
304 of Imbo plain and Mumirwa slopes, North East (NE) Depressions and Central plateau, the  
305 pair wise fixation index was 0.010, 0.023 and 0.020, respectively, indicating very low  
306 differentiation between populations. Pair wise fixation index between landraces of  
307 Mumirwa Slopes and NE Depressions, between landraces of Central plateau and NE  
308 Depressions were 0.027 and 0.028 respectively ([Table 4](#)).

309

310

311 **Table 4** Pairwise fixation index between landraces from different locations

|                              | Elite genotypes | Landraces of Imbo Plain | Landraces of Mumirwa Slopes | Landraces of NE Depressions | Landraces of Central Plateau |
|------------------------------|-----------------|-------------------------|-----------------------------|-----------------------------|------------------------------|
| Elite genotypes              | -               |                         |                             |                             |                              |
| Landraces of Imbo Plain      | 0.071           | -                       |                             |                             |                              |
| Landraces of Mumirwa Slopes  | 0.095           | 0.010                   | -                           |                             |                              |
| Landraces of NE Depressions  | 0.073           | 0.023                   | 0.027                       | -                           |                              |
| Landraces of Central Plateau | 0.083           | 0.020                   | 0.001                       | 0.028                       | -                            |

312

313 **Fig 6.** Genetic relationships between cassava populations based on Nei's genetic distance

314 Within population, output values for pair wise fixation index were greater than 25% for all  
 315 populations indicating high differentiation between genotypes ([Table 5](#)). Pair wise fixation  
 316 index of 0.59, 0.60, 0.57, 0.59 and 0.56 was noted within elite genotypes and landraces of  
 317 Imbo plain, Mumirwa slopes, NE depressions and Central plateau, respectively, indicating  
 318 high variation between genotypes ([Table 5](#)). The heterozygosity was calculated per marker  
 319 and population, where observed heterozygosity ( $H_o$ ) was greater than expected  
 320 heterozygosity ( $H_e$ ) in all populations except elite genotypes, indicating a suspected mixing  
 321 of previously isolated populations ([Table 5](#)).

322 **Table 5** Fixation index and heterozygosity within population

| Population                   | Fixation Index F within population | Observed heterozygosity ( $H_o$ ) | Expected heterozygosity ( $H_e$ ) |
|------------------------------|------------------------------------|-----------------------------------|-----------------------------------|
| Elite genotypes              | 0.59                               | 0.25                              | 0.27                              |
| Landraces of Imbo Plain      | 0.60                               | 0.27                              | 0.25                              |
| Landraces of Mumirwa slopes  | 0.57                               | 0.27                              | 0.25                              |
| Landraces of NE Depressions  | 0.59                               | 0.26                              | 0.25                              |
| Landraces of Central Plateau | 0.56                               | 0.26                              | 0.25                              |

324

## 325 **Comparison of results from morphological and molecular** 326 **dendrograms**

327 Morphological classification clustered accessions into three main groups, whereas  
328 molecular analysis clustered accessions into six groups. All genotypes in clusters I and II for  
329 morphological classification method and clusters III, V and VI for genetic classification  
330 method were local landraces. Cluster I in the genetic classification method only consisted of  
331 elite genotypes (Pwani and Mkumba) while clusters II and IV for the same method and  
332 cluster III for the morphological clustering method contained both local landraces and elite  
333 genotypes.

334

## 335 **Discussion**

### 336 **Morphological traits**

337 Morphological characterization based on leaf traits (color of apical leaves, color of end  
338 branches of adult plant, pubescence on apical leaves, shape of central leaf lobe, petiole color,  
339 prominence of foliar scars, distance between leaf scars, leaf color, petiole orientation), stem  
340 traits (color of stem cortex, color of stem epidermis, color of stem exterior, growth habit of  
341 stem) and root traits (color of root cortex, color of root-pulp, external color of storage root  
342 and root taste) were diverse among the cassava landraces as well as the elite germplasm  
343 studied. These traits are very interesting and can be used in breeding and in identifying  
344 varieties.

### 345 **Leaf traits**

346 The leaf traits play an important role in cultivar identification and are more relevant for  
347 selection of cassava varieties suitable for the leafy vegetable markets. Leaf shape is one such  
348 an important trait as it affects leaf area and hence light interception which can directly



349 affect root yield [41]. [42, 14] reported respectively that leaf shape and color were the most  
350 important variables to distinguish cassava accessions and that farmers identify their  
351 cassava cultivars based on the traits related to leaf and stem color. The analysis revealed  
352 that apical leaves of 68% of cultivars were colored purplish green as dominant color and  
353 the mature leaves of 72.9% of cultivars are colored dark green as dominant color. [43]  
354 reported that leaf color plays an important role in predicting fresh root weight as nearly  
355 90% of the dry matter (or biomass) of a plant is produced by leaves. Study of Khumaida et  
356 al. [44] revealed that dark green leaf color would increase the weight of tubers per plant,  
357 thus, can be useful in predicting root yield estimates of several cassava genotypes. Analysis  
358 also revealed few accessions colored light green on apical leaves, having hairs and with  
359 central leaflet shaped linear- pyramidal, which were comparable to those obtained by  
360 Nadjiam et al. [13]. According to Ehleringer et al. [45], presence of hair on apical leaves  
361 reduces leaf light absorbance, heat load, and consequently lower leaf temperatures and  
362 transpiration rates. On the other hand, presence of hairs on leaves lowers photosynthetic  
363 activity, and therefore lowers the yield. In addition, most of the end branches of adult plants  
364 of most of the genotypes were colored greenish purple. Comparable results were obtained  
365 by Eze et al. [46] who reported the predominant greenish purple color of end branches in  
366 adult plants in cassava varieties from Nigeria.

### 367 **Stem traits**

368 Most of the landrace accessions had stem epidermis and stem exterior colored light brown  
369 and grey, respectively. Similar findings were reported by Kosh-Komba et al. [47] who  
370 studied the diversity of cassava in Central Africa Republic and underlined clusters of  
371 accessions characterized by stems colored light brown and gray. Our results revealed that  
372 more than 78% of characterized cassava genotypes had prominent foliar scars while more  
373 than 21% had semi-prominent foliar scars. According to [48, 49], when cuttings are planted

374 in soil, roots developed from the foliar scars as well as lateral branches. Furthermore, the  
375 distance between leaf scars determines the number of scars per unit stem length and  
376 indeed the number of lateral branches.

### 377 **Root traits**

378 Presence of accessions showing cream color on root cortex and cream color on root pulp  
379 confirmed the presence of genotypes with low levels of beta-carotene, the precursor of  
380 Vitamin A [50]. Furthermore, yellow cassava roots are associated with high levels of  
381 proteins in leaves and, therefore, improving cassava for high beta-carotene content could  
382 also improve the overall nutritional value of the crop [50]. Almost 80% of the accessions  
383 were found to have a bitter taste, suggesting that roots from these cultivars may have high  
384 levels of toxic cyanogenic glucosides and therefore, must be processed prior to  
385 consumption as suggested by Chiwona-Karltun et al. [51]. Furthermore, the presence of  
386 different colors of the external storage roots can be used to differentiate cassava accessions.

### 387 **Molecular characterization**

388 The analysis based on molecular characterization clustered accessions into six main  
389 clusters indicating varying genetic distances between genotypes. Clusters I contained two  
390 elite genotypes, Pwani and Mkumba that shared all genetic characteristics, suggestive of  
391 putative duplicates. The putative duplicates clones detected within cluster I such as Pwani  
392 and Mkumba, which were distributed by the “New Cassava varieties and Clean Seed to  
393 Combat CMD and CBSD” (5CP) project have previously been shown to be the same genotype  
394 by Ferguson et al. (in press) (Supplementary file S12).

395 Clusters III, V and VI had eight, seven and 33 of all landraces, respectively, suggesting  
396 that landraces in each group shared similar genetic traits. Under cluster II, five elite  
397 genotypes clustered together with four local landraces while in cluster IV, seven elite  
398 genotypes clustered together with 51 local landraces, suggesting that some local landraces

399 and elite genotypes have similar genetic characteristics. Thus, the local landraces that  
400 belonged to the two clusters (II and IV) could be possible sources of resistance or they could  
401 be related due to genetic elements that control other traits other than resistance.  
402 Furthermore, in cluster II, a pair of accessions namely: Nakarasi ya congo and Rumonge  
403 shared all genetic characteristics, indicating that these accessions can be assumed to be  
404 putative duplicates clones.

## 405 **Morphological and molecular analysis**

406 Accessions that shared similar morphological characteristics were distinct at the molecular  
407 level, indicating that the resolution provided by morphological traits is lower than with  
408 molecular markers. These results are in agreement with findings of [52, 53] who reported  
409 that plants showing similar morphological characteristics could be very distinct at  
410 molecular level. In addition, [52, 54] reported that clustering using morphological traits is  
411 less reliable due to the influence of the environment and plant growth stage on their  
412 expression and the limited number of markers to distinguish entities. This phenomenon  
413 could explain the changing and clustering observed in comparing the hierarchical cluster  
414 dendrograms for the morphological and molecular traits [54]. Accessions Kizimbani,  
415 Rumonge, Munembwe and Tajirika were grouped in clusters II for both morphological and  
416 molecular characterization. Pwani and Mkumba are grouped in cluster I for molecular  
417 characterization while cluster III in morphological characterization together with  
418 Kibandameno, Albert, TZ130, F10-30-R2, Nase 14 and MM96/5280 in one of the sub  
419 clusters, demonstrating the varied discriminative powers of the two methods of  
420 characterization. The putative duplicates clones detected within clusters shows that some  
421 genotypes such as Pwani and Mkumba, belonging to elite germplasm and Imiduga,  
422 Mutsindekwiburi and Rubona belonging to local landraces are several copies, thus could be  
423 pooled together as one cultivar. Difference of number of clusters between the two methods

424 of characterization was due to the number of specific traits and genetic variations for  
425 phenotypic and genotypic classification respectively. However, the phenotypic classification  
426 dealt with a small number of traits while the genotypic classification dealt with more than  
427 18 000 SNPs, hence the genotypic classification showed a lot of differences between  
428 accessions. Comparable results have been reported by [55, 56] while identifying duplicate  
429 accessions based on multi-locus analysis, and concluded that accessions presenting similar  
430 SNP profiles were assumed to be putative duplicates as each multi locus genotype  
431 corresponded to a single genotype.

432

## 433 **Conclusion**

434 The aim of this study was to determine the morphological and genotypic polymorphism in  
435 the local landraces and characterize elite cassava genotypes as well as identifying  
436 duplicates. Morphological and molecular characterization showed distinct classes of  
437 cultivars and within each class, sub classes with similar SNP profiles were identified.  
438 Accessions having very close similar characteristics namely Pwani and Mkumba, and  
439 Imiduga, Mutsindekwiburi and Rubona should be considered as putative duplicates, hence,  
440 need to be pooled together as one cultivar. Despite the variabilities found within the  
441 collection, it was concluded that cassava landraces in Burundi as well as the introduced  
442 clones present a narrow genetic base.

443

## 444 **Acknowledgments**

445 This work was sponsored by the International Institute of Tropical Agriculture (IITA) under  
446 the 'CBSD (Cassava Brown Streak Disease) Control Project'. The project is funded by the  
447 International Fund for Agricultural Development (IFAD) and the "Institut des Sciences

448 Agronomiques du Burundi” (ISABU) is the main partner in Burundi. The cassava research  
449 team from ISABU are acknowledged for their support in trial management and data  
450 collection. Ms Chepkoech, Jackline, a laboratory technician at the Integrated Genotyping  
451 Service and Support (IGSS) of the Bioscience Eastern and Central Africa supported the  
452 molecular analysis work.

453

## 454 **References**

- 455 1. FAO/STAT. Food and Agriculture Organization of the United Nations, Rome, Italy,  
456 2019. <http://www.fao.org/faostat/en/#data/QC/visualize>.
- 457 2. Aloys N, Hui Ming Z. Traditional cassava foods in Burundi - A review. *Food reviews*  
458 *international* 2006; 22: 1-27. <https://doi.org/10.1080/87559120500379761>.
- 459 3. Acquaaah G. Breeding Clonally Propagated Species. In *Principles of Plant Genetics and*  
460 *Breeding* 2012; 374-381. <https://doi.org/10.1002/9781118313718.ch19>.
- 461 4. Ceballos H, Kawuki RS, Gracen VE, Yencho GC, Hershey CH. Conventional breeding,  
462 marker-assisted selection, genomic selection and inbreeding in clonally propagated  
463 crops: a case study for cassava. *Theoretical and Applied Genetics* 2015; 128: 1647-  
464 1667. <https://doi.org/10.1007/s00122-015-2555-4>.
- 465 5. Fukuda WM, de Oliveira S, Iglesias C. Cassava breeding. *Crop Breeding and Applied*  
466 *Biotechnology* 2002; 2: 617-638.
- 467 6. Ceballos H, Iglesias CA, Pérez JC, Dixon AG. Cassava breeding: opportunities and  
468 challenges. *Plant molecular biology* 2004; 56: 503-516.  
469 <https://doi.org/10.1007/s11103-004-5010-5>.

- 470 7. Ceballos H, Pérez JC, Joaqui Barandica O, Lenis JI, Morante N, Calle F, et al. Cassava  
471 breeding I: The value of breeding value. *Frontiers in Plant Science* 2016; 7:1227.  
472 <https://doi.org/10.3389/fpls.2016.01227>.
- 473 8. Borromeo TH. Importance of plant genetic resources in sustainable development:  
474 global challenges, and solutions being developed in the Philippines. *Journal of*  
475 *Developments in Sustainable Agriculture* 2012; 7: 23-32.
- 476 9. Afuape SO, Okocha PI, Njoku D. Multivariate assessment of the agromorphological  
477 variability and yield components among sweet potato (*Ipomoea batatas* (L.) Lam)  
478 landraces. *African Journal of Plant Science* 2011; 5: 123-132.  
479 <https://doi.org/10.5897/AJPS.9000176>.
- 480 10. Chiveu CJ, Dangasuk OG, Omuynin ME, Wachira FN. Quantitative variation among  
481 Kenyan populations of *Acacia senegal* (L.) Willd. for gum production, seed and growth  
482 traits. *New Forests* 2009; 38: 1. <https://doi.org/10.1007/s11056-008-9128-1>.
- 483 11. Diouf M, Mbengue NB, Kante A. Caractérisation des accessions de 4 espèces de  
484 légumes-feuilles traditionnels (*Hibiscus sabdariffa* L., *Vigna unguiculata* (L.) WALP,  
485 *Amaranthus* L. spp et *Moringa oleifera* LAM) au Sénégal. 2007.
- 486 12. Moura EF, Farias Neto JT, Sampaio JE, Silva DT, Ramalho GF. Identification of  
487 duplicates of cassava accessions sampled on the North Region of Brazil using  
488 microsatellite markers. *Acta Amazonica* 2013; 43: 461-467.  
489 <https://doi.org/10.1590/S0044-59672013000400008>.
- 490 13. Nadjiam D, Sarr PS, Naïtormbaïdé M, Mbaïguinam JM, Guisse A. Agro-morphological  
491 characterization of cassava (*Manihot esculenta* Crantz) cultivars from Chad.  
492 *Agricultural Sciences* 2016; 7: 479-492. <https://doi.org/10.4236/as.2016.77049>.
- 493 14. Agre AP, Gueye B, Adjatin A, Dansi M, Bathacharjee R, Rabbi IY, et al. Folk taxonomy  
494 and traditional management of cassava (*Manihot esculenta* Crantz) diversity in

- 495 southern and central Benin. International Journal of Innovation and Scientific  
496 Research 2016; 20: 500-515.
- 497 15. Rabbi IY, Kayondo SI, Bauchet G, Yusuf M, Aghogho CI, Ogunpaimo K, et al. Genome-  
498 wide association analysis reveals new insights into the genetic architecture of  
499 defensive, agro-morphological and quality-related traits in cassava. Plant Molecular  
500 Biology 2020; 30: 1-9. <https://doi.org/10.1007/s11103-020-01038-3>.
- 501 16. De Souza CR. Genetic and genomic studies of cassava. Genes, Genomes and Genomics  
502 2007; 1: 157-166.
- 503 17. Fregene M, Angel F, Gómez R, Rodríguez F, Chavarriaga P, Roca W, et al. A molecular  
504 genetic map of cassava (*Manihot esculenta* Crantz). Theoretical and Applied Genetics  
505 1997; 95: 431-441. <https://doi.org/10.1007/s001220050580>.
- 506 18. Kizito EB, Bua A, Fregene M, Egwang T, Gullberg U, Westerbergh A. The effect of  
507 cassava mosaic disease on the genetic diversity of cassava in Uganda. Euphytica 2005;  
508 146: 45-54. <https://doi.org/10.1007/s10681-005-2959-3>.
- 509 19. Fregene MA, Suarez M, Mkumbira J, Kulembeka H, Ndedya E, Kulaya A, et al. Simple  
510 sequence repeat marker diversity in cassava landraces: genetic diversity and  
511 differentiation in an asexually propagated crop. Theoretical and Applied Genetics  
512 2003; 107: 1083-1093. <https://doi.org/10.1007/s00122-003-1348-3>.
- 513 20. Montero-Rojas M, Correa AM, Siritunga D. Molecular differentiation and diversity of  
514 cassava (*Manihot esculenta*) taken from 162 locations across Puerto Rico and  
515 assessed with microsatellite markers. AoB Plants. 2011.
- 516 21. Elias M, Panaud O, Robert T. Assessment of genetic variability in a traditional cassava  
517 (*Manihot esculenta* Crantz) farming system, using AFLP markers. Heredity 2000; 85:  
518 219-230. <https://doi.org/10.1046/j.1365-2540.2000.00749.x>.

- 519 22. Fregene M, Bernal A, Duque M, Dixon A, Tohme J. AFLP analysis of African cassava  
520 (Manihot esculenta Crantz) germplasm resistant to the cassava mosaic disease  
521 (CMD). Theoretical and Applied Genetics 2000; 100: 678-685.  
522 <https://doi.org/10.1007/s001220051339>.
- 523 23. Marmey P, Beeching JR, Hamon S, Charrier A. Evaluation of cassava (Manihot  
524 esculenta Crantz) germplasm collections using RAPD markers. Euphytica 1993; 74:  
525 203-209. <https://doi.org/10.1007/BF00040402>.
- 526 24. Karim KY, Ifie B, Dzidzienyo D, Danquah EY, Blay ET, Whyte JB, et al. Genetic  
527 characterization of cassava (Manihot esculenta Crantz) genotypes using agro-  
528 morphological and single nucleotide polymorphism markers. Physiology and  
529 Molecular Biology of Plants 2019; 26: 317-330. [https://doi.org/10.1007/s12298-019-  
530 00740-x](https://doi.org/10.1007/s12298-019-00740-x).
- 531 25. Mammadov J, Aggarwal R, Buyyarapu R, Kumpatla S. SNP markers and their impact on  
532 plant breeding. International journal of plant genomics 2012; 2012.  
533 <https://doi.org/10.1155/2012/728398>.
- 534 26. Masumba EA, Kapinga F, Mkamilo G, Salum K, Kulembeka H, Rounsley S, et al. QTL  
535 associated with resistance to cassava brown streak and cassava mosaic diseases in a  
536 bi-parental cross of two Tanzanian farmer varieties, Namikonga and Albert.  
537 Theoretical and Applied Genetics 2017; 130: 2069-2090.  
538 <https://doi.org/10.1007/s00122-017-2943-z>.
- 539 27. Nzuki I, Katari MS, Bredeson JV, Masumba E, Kapinga F, Salum K, et al. QTL mapping  
540 for pest and disease resistance in cassava and coincidence of some QTL with  
541 introgression regions derived from Manihot glaziovii. Frontiers in plant science 2017;  
542 8:1168. <https://doi.org/10.3389/fpls.2017.01168>.



- 543 28. Ferguson ME, Shah T, Kulakow P, Ceballos H. A global overview of cassava genetic  
544 diversity. PloS one 2019; 14: e0224763.  
545 <https://doi.org/10.1371/journal.pone.0224763>.
- 546 29. Xia L, Peng K, Yang S, Wenzl P, De Vicente MC, Fregene M, Kilian A. DArT for high-  
547 throughput genotyping of cassava (*Manihot esculenta*) and its wild relatives.  
548 Theoretical and Applied Genetics 2005; 110: 1092-1098.  
549 <https://doi.org/10.1007/s00122-005-1937-4>.
- 550 30. Wenzl P, Huttner E, Carling J, Xia L, Blois H, Caig V, et al. Diversity Arrays Technology  
551 (DArT): A generic high-density genotyping platform. In 7th International Safflower  
552 Conference. 2008.
- 553 31. Fukuda WM, Guevara CL, Kawuki R, Ferguson ME. Selected morphological and  
554 agronomic descriptors for the characterization of cassava. IITA. 2010.
- 555 32. Kilian A, Wenzl P, Huttner E, Carling J, Xia L, Blois H et al. Diversity arrays technology:  
556 a generic genome profiling technology on open platforms. Methods in Molecular  
557 Biology 2012; 888: 67-89. [https://doi.org/10.1007/978-1-61779-870-2\\_5](https://doi.org/10.1007/978-1-61779-870-2_5). PMID:  
558 [22665276](https://pubmed.ncbi.nlm.nih.gov/22665276/).
- 559 33. Raman R, Cowley RB, Raman H, Luckett DJ. Analyses using SSR and DArT molecular  
560 markers reveal that Ethiopian accessions of white lupin (*Lupinus albus* L.) represent a  
561 unique gene pool. Open Journal of Genetics 2014; 4: 87-98.  
562 <https://doi.org/10.4236/ojgen.2014.42012>.
- 563 34. Gruber B, Unmack P, Berry O, Georges A. Introduction to dartR. User Manual. 2019.
- 564 35. Adamack AT, Gruber B. PopGenReport: simplifying basic population genetic analyses  
565 in R. Methods in Ecol Evol. 2014; 5: 384-387. [https://doi.org/10.1111/2041-  
566 \[210X.12158\]\(https://doi.org/10.1111/2041-210X.12158\)](https://doi.org/10.1111/2041-210X.12158).

- 567 36. Jombart T, Ahmed I. Adegnet 1.3-1: new tools for the analysis of genome-wide SNP  
568 data. *Bioinformatics* 2011; 27: 3070-3071.  
569 <https://doi.org/10.1093/bioinformatics/btr521>.
- 570 37. Jombart T. Adegnet: a R package for the multivariate analysis of genetic markers.  
571 *Bioinformatics* 2008; 24:1403–1405.  
572 <https://doi.org/10.1093/bioinformatics/btn129>.
- 573 38. El Mousadik A, Petit RJ. High level of genetic differentiation for allelic richness among  
574 populations of the argan tree [*Argania spinosa* (L.) Skeels] endemic to Morocco.  
575 *Theoretical and applied genetics* 1996; 92: 832-839.  
576 <https://doi.org/10.1007/BF00221895>.
- 577 39. Hoque MN, Rahman L. Estimation of Euclidean distance for different morpho-  
578 physiological characters in some wild and cultivated rice genotypes (*Oryza sativa*  
579 L.). *Journal of Biological Sciences* 2007; 7, 86-88.  
580 <https://doi.org/10.3923/jbs.2007.86.88>.
- 581 40. Perrier X, Jacquemoud-Collet JP. DARwin software. 2006. <http://darwin.cirad.fr/>
- 582 41. Nkansah GO, Ofosu-Budu KG, Ayarna AW. Genetic diversity among local and  
583 introduced avocado germplasm based on morpho-agronomic traits. *International*  
584 *Journal of Plant Breeding and Genetics* 2013; 7: 76-91.  
585 <https://dx.doi.org/10.3923/ijpbg.2013.76.91>.
- 586 42. Asare PA, Galyuon IK, Sarfo JK, Tetteh JP. Morphological and molecular based diversity  
587 studies of some cassava (*Manihot esculenta* Crantz) germplasm in Ghana. *African*  
588 *Journal of Biotechnology* 2011; 10:13900-13908. <https://doi.org/10.5897/AJB11.929>.
- 589 43. Phosaengsri W, Banterng P, Vorasoot N, Jogloy S, Theerakulpisut P. Leaf performances  
590 of cassava genotypes in different seasons and its relationship with biomass. *Turkish*  
591 *Journal of Field Crops* 2019; 24: 54-64. <https://doi.org/10.17557/tjfc.564116>.

- 592 44. Khumaida N, Maharani S, Ardie SW. The leaf color performance on several lines of  
593 cassava and its relation with tuber yield as early reference. *Procedia Environmental*  
594 *Sciences* 2015; 24: 39-46. <https://doi.org/10.1016/j.proenv.2015.03.007>.
- 595 45. Ehleringer JR, Mooney HA. Leaf hairs: effects on physiological activity and adaptive  
596 value to a desert shrub. *Oecologia* 1978; 37: 183-200.  
597 <https://doi.org/10.1007/BF00344990>.
- 598 46. Eze SC, Aba SC, Amuji CF. Phenotypic diversity in agro morphological features of six  
599 new cassava (*Manihot esculenta* Crantz) genotypes evaluated in Nsukka, Southeast,  
600 Nigeria. *Nigerian Journal of Crop Science* 2016; 3: 31- 49.
- 601 47. Kosh-Komba E, Akpavi S, Yao AW, Atato A, Duval MF, Dourma M, et al. Diversité  
602 agromorphologique de *Manihot esculenta* Crantz.(Euphorbiaceae) cultivée dans trois  
603 zones agroclimatiques en République centrafricaine (RCA). *European Scientific*  
604 *Journal* ; 2014.
- 605 48. Adu MO, Asare PA, Asare-Bediako E, Amenorpe G, Ackah FK, Afutu E, et al.  
606 Characterizing shoot and root system trait variability and contribution to genotypic  
607 variability in juvenile cassava (*Manihot esculenta* Crantz) plants. *Heliyon* 2018; 4:  
608 e00665. <https://doi.org/10.1016/j.heliyon.2018.e00665>. PMID: [30003159](https://pubmed.ncbi.nlm.nih.gov/30003159/)
- 609 49. Banoc DM, Yamauchi A, Iijima M, Kono Y. Root system development of cassava and  
610 sweetpotato during early growth stage as affected by high root zone temperature.  
611 *Plant production science* 1999; 2: 247-251. <https://doi.org/10.1626/pps.2.247>.
- 612 50. Njenga P, Edema R, Kamau J. Combining ability for beta-carotene and important  
613 quantitative traits in a cassava F1 population. *Journal of Plant Breeding and Crop*  
614 *Science* 2014; 6: 24-30. <https://doi.org/10.5897/JPBCS12.069>.
- 615 51. Chiwona-Karltun L, Brimer L, Kalenga Saka JD, Mhone AR, Mkumbira J, Johansson L, et  
616 al. Bitter taste in cassava roots correlates with cyanogenic glucoside levels. *Journal of*

- 617 the Science of Food and Agriculture 2004; 84: 581-590.  
618 <https://doi.org/10.1002/jsfa.1699>.
- 619 52. Sujii PS, Fernandes ET, Azevedo VC, Ciampi AY, Martins K, de O Wadt LH.  
620 Morphological and molecular characteristics do not confirm popular classification of  
621 the Brazil nut tree in Acre, Brazil. Genet Mol Res. 2013; 12: 4018-4027.  
622 <http://dx.doi.org/10.4238/2013.September.27.3>.
- 623 53. Feldberg K, Váňa J, Schulze C, Bombosch A, Heinrichs J. Morphologically similar but  
624 genetically distinct: on the differentiation of *Syzygiella concreta* and *S. perfoliata*  
625 (Adelanthaceae subfam. Jamesonielloideae). The Bryologist 2011; 114: 686-695.  
626 <https://doi.org/10.1639/0007-2745-114.4.686>.
- 627 54. Darkwa K, Agre P, Olanmi B, Iseki K, Matsumoto R, Powell A, et al. Comparative  
628 assessment of genetic diversity matrices and clustering methods in white Guinea yam  
629 (*Dioscorea rotundata*) based on morphological and molecular markers. Sci Rep. 2020;  
630 10: 1-4. <https://doi.org/10.1038/s41598-020-69925-9>.
- 631 55. Albuquerque HY, Oliveira EJ, Brito AC, Andrade LR, Carmo CD, Morgante CV, et al.  
632 Identification of duplicates in cassava germplasm banks based on single-nucleotide  
633 polymorphisms (SNPs). Scientia Agricola 2019; 76: 328-336.  
634 <https://doi.org/10.1590/1678-992X-2017-0389>.
- 635 56. Arnaud-Haond S, Duarte CM, Alberto F, Serrao EA. Standardizing methods to address  
636 clonality in population studies. Mol Ecol. 2007; 16: 5115-5139.  
637 <https://doi.org/10.1111/j.1365-294X.2007.03535.x>.

638

## 639 **Supporting information**

640 **S1 Table.** SNP data from DArtR Seq. 0: homozygous reference allele, 1: homozygous  
641 alternate allele, 2: heterozygous alleles, -: missing value, M1 to M18124: numbers of SNP's

642 **S2 Table.** Hamming distance matrix.

643 **S3 Table.** Morphological traits.

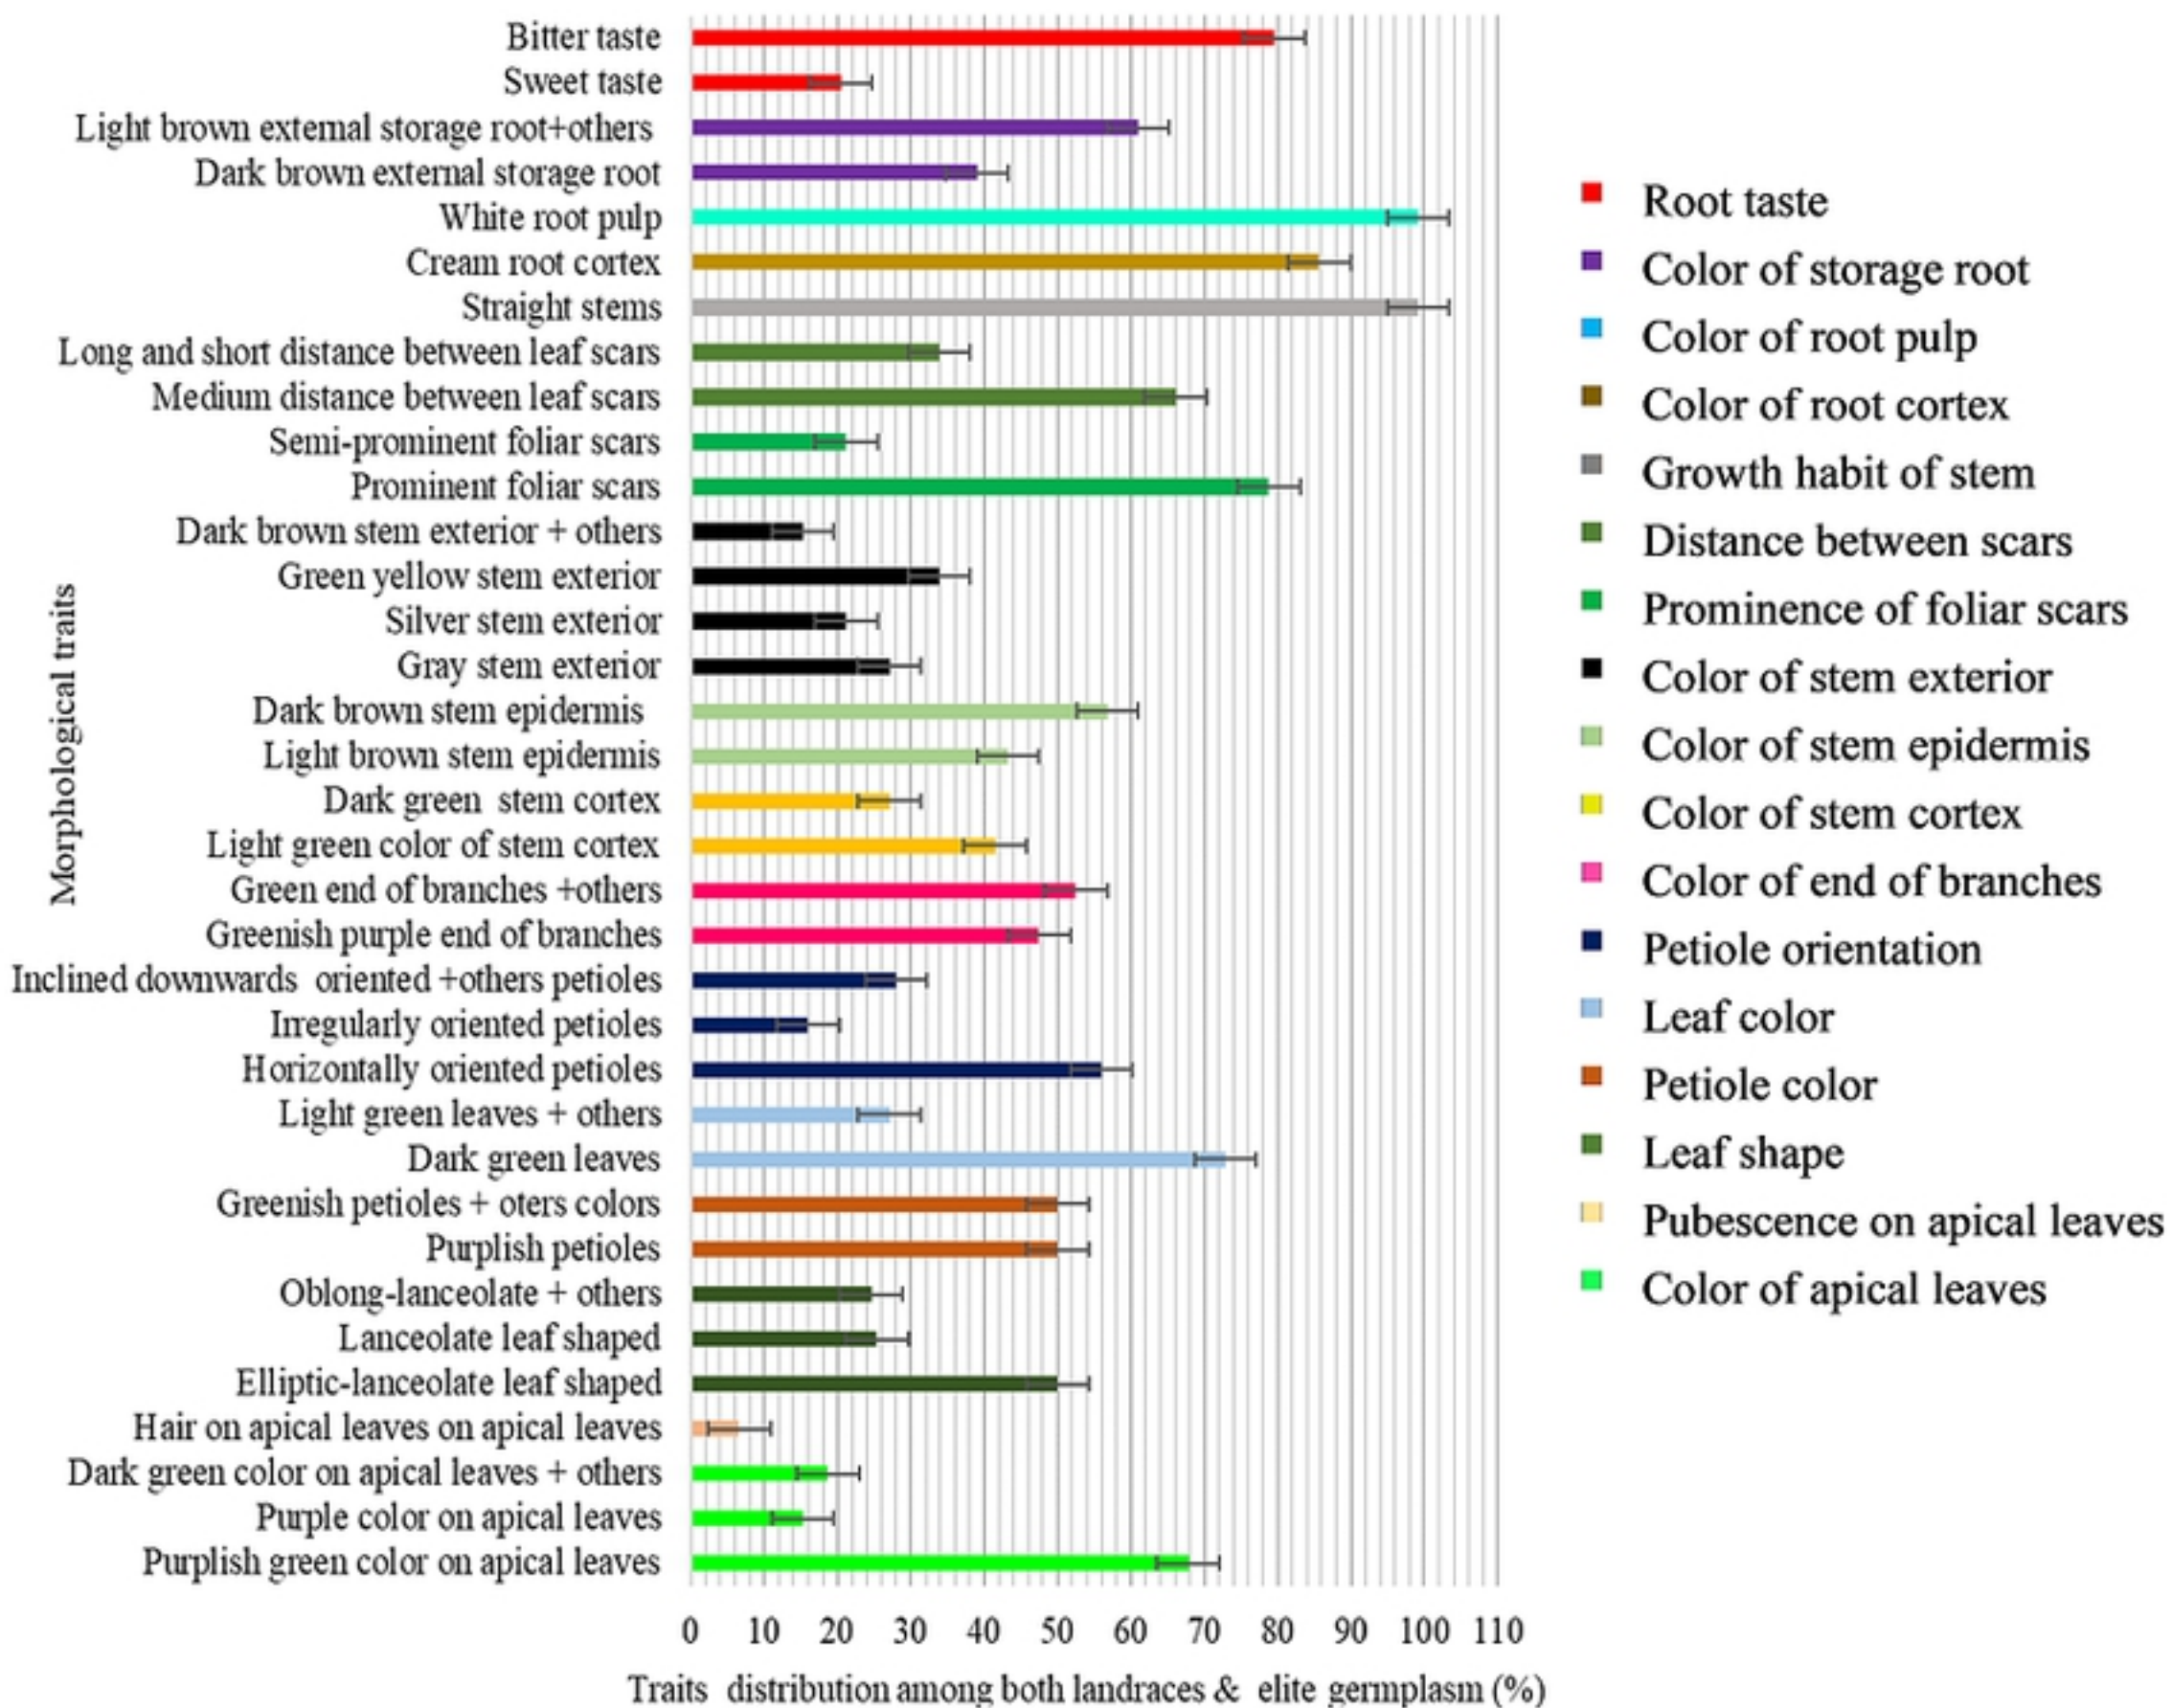

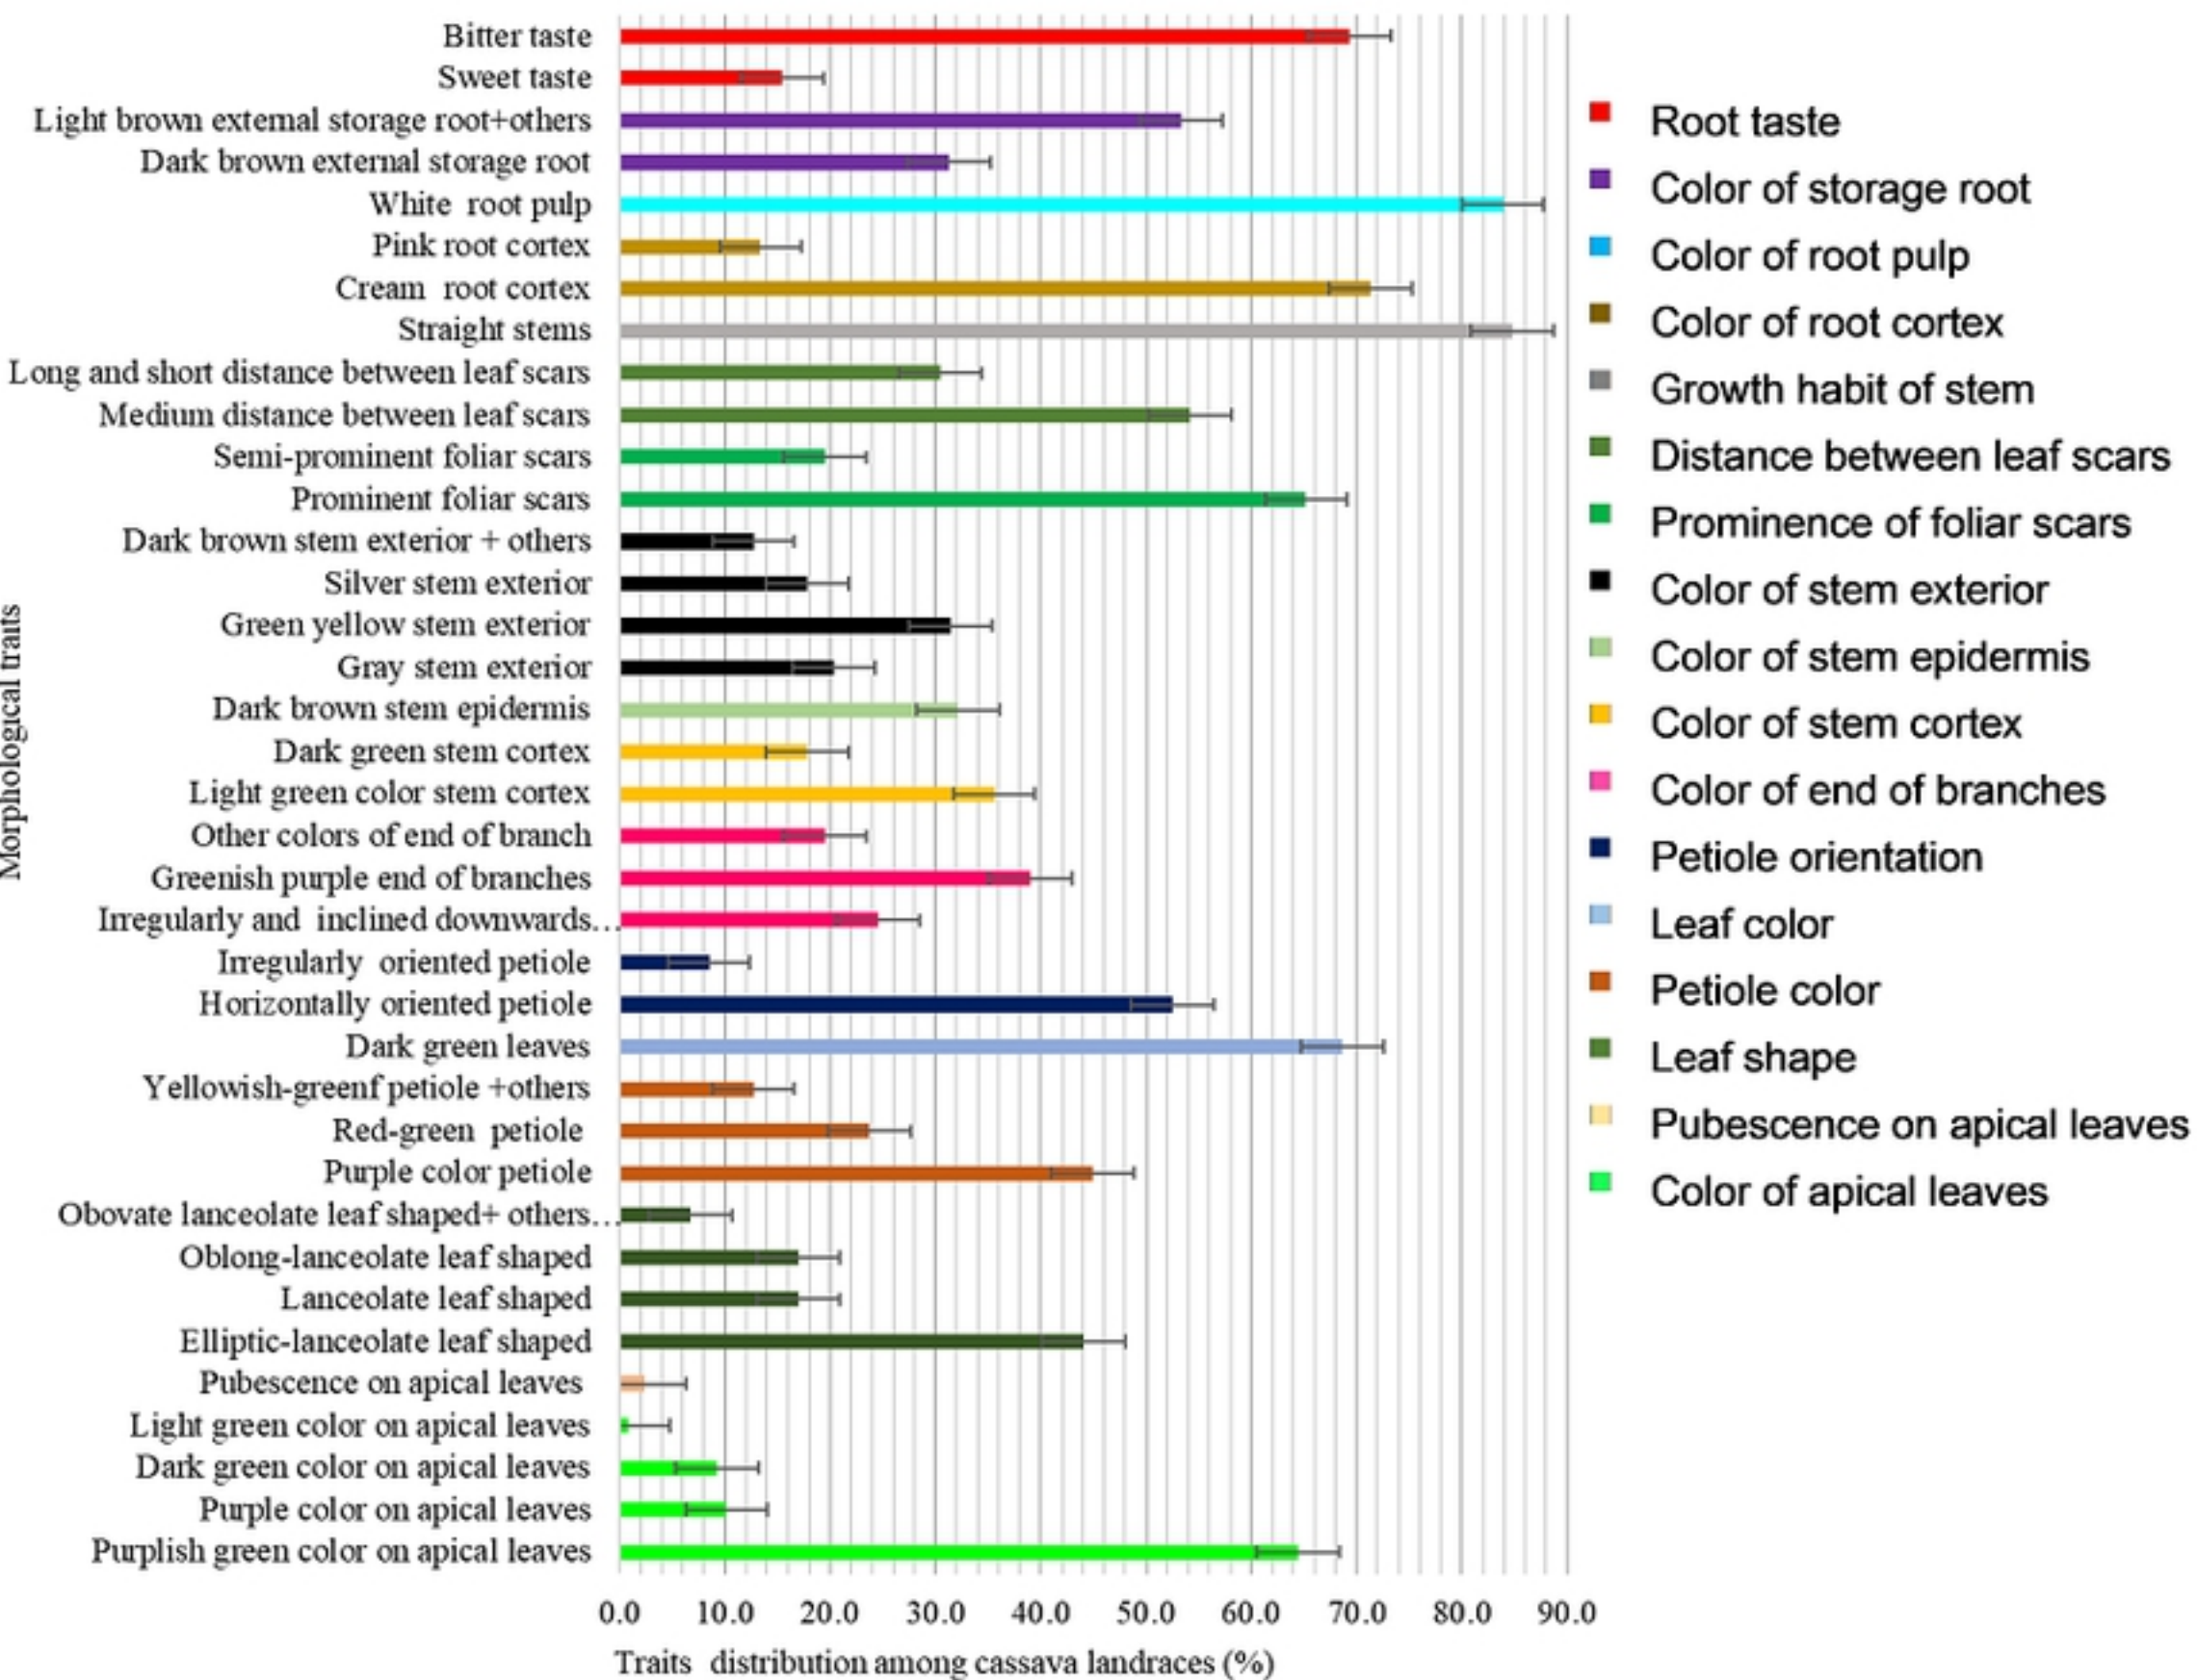

bioRxiv preprint doi: <https://doi.org/10.1101/2021.08.09.455732>; this version posted August 9, 2021. The copyright holder for this preprint (which was not certified by peer review) is the author/funder, who has granted bioRxiv a license to display the preprint in perpetuity. It is made available under aCC-BY 4.0 International license.

Morphological traits

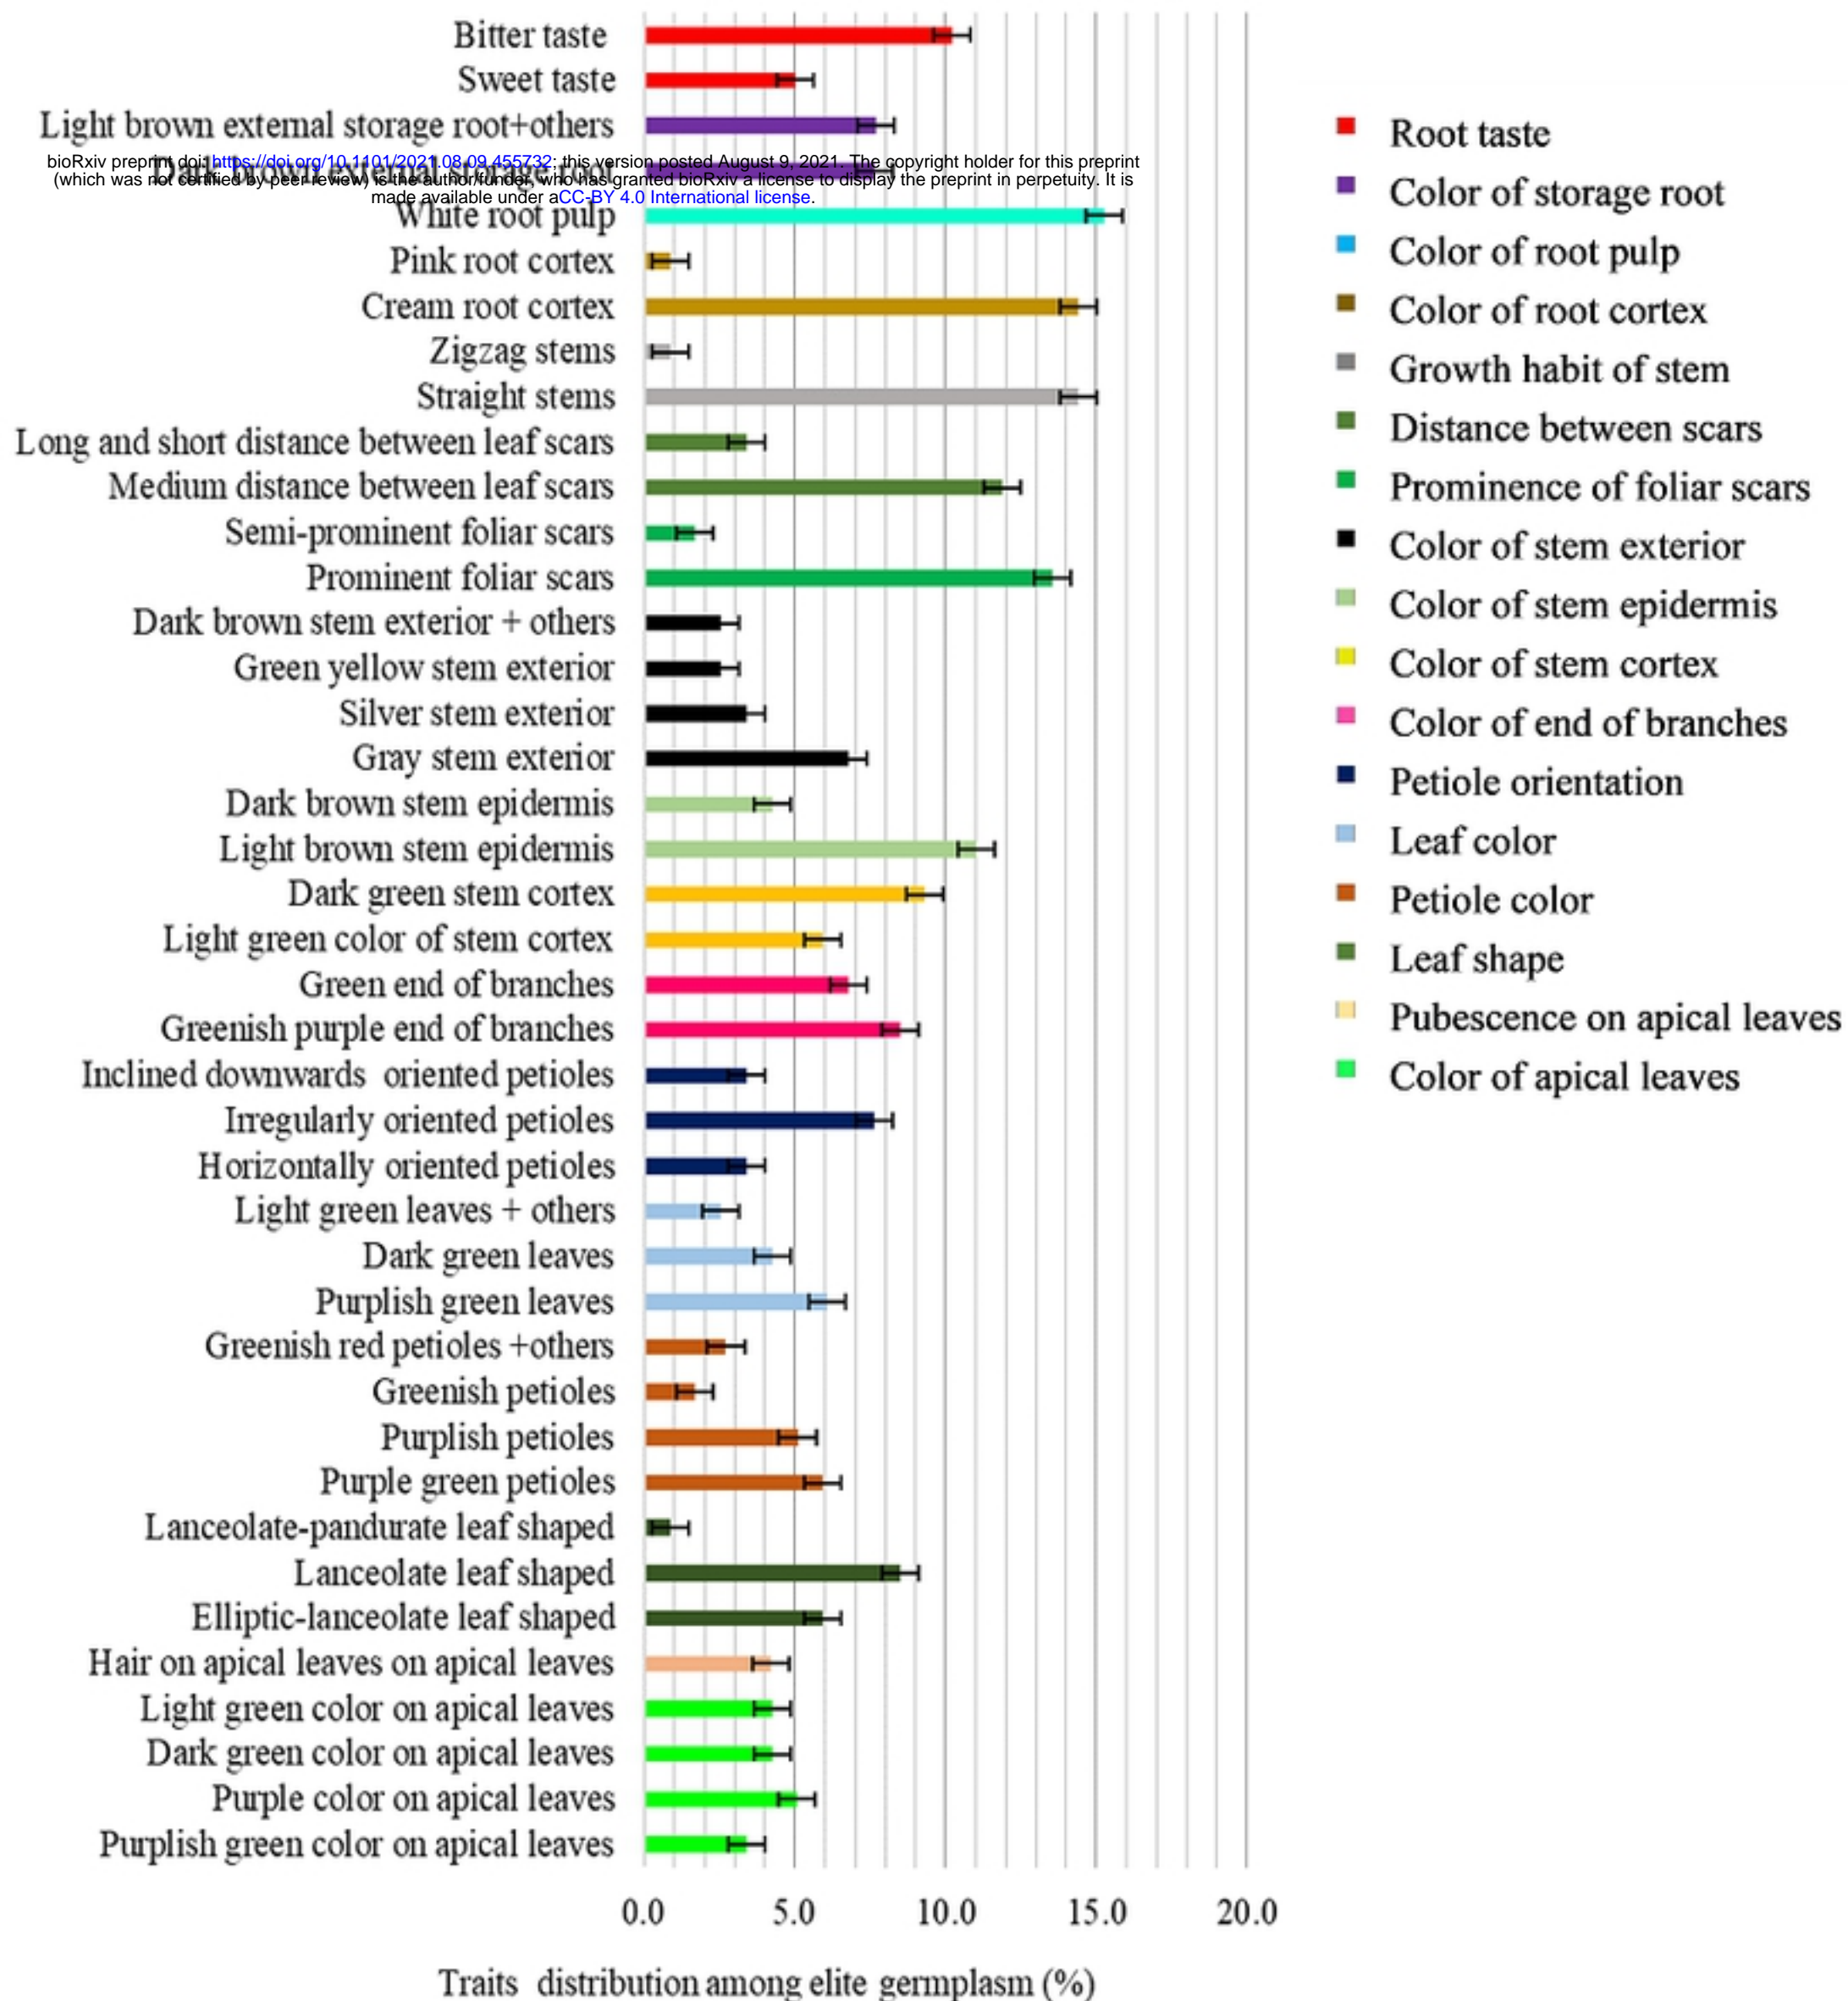



Dendrogram using Ward Linkage

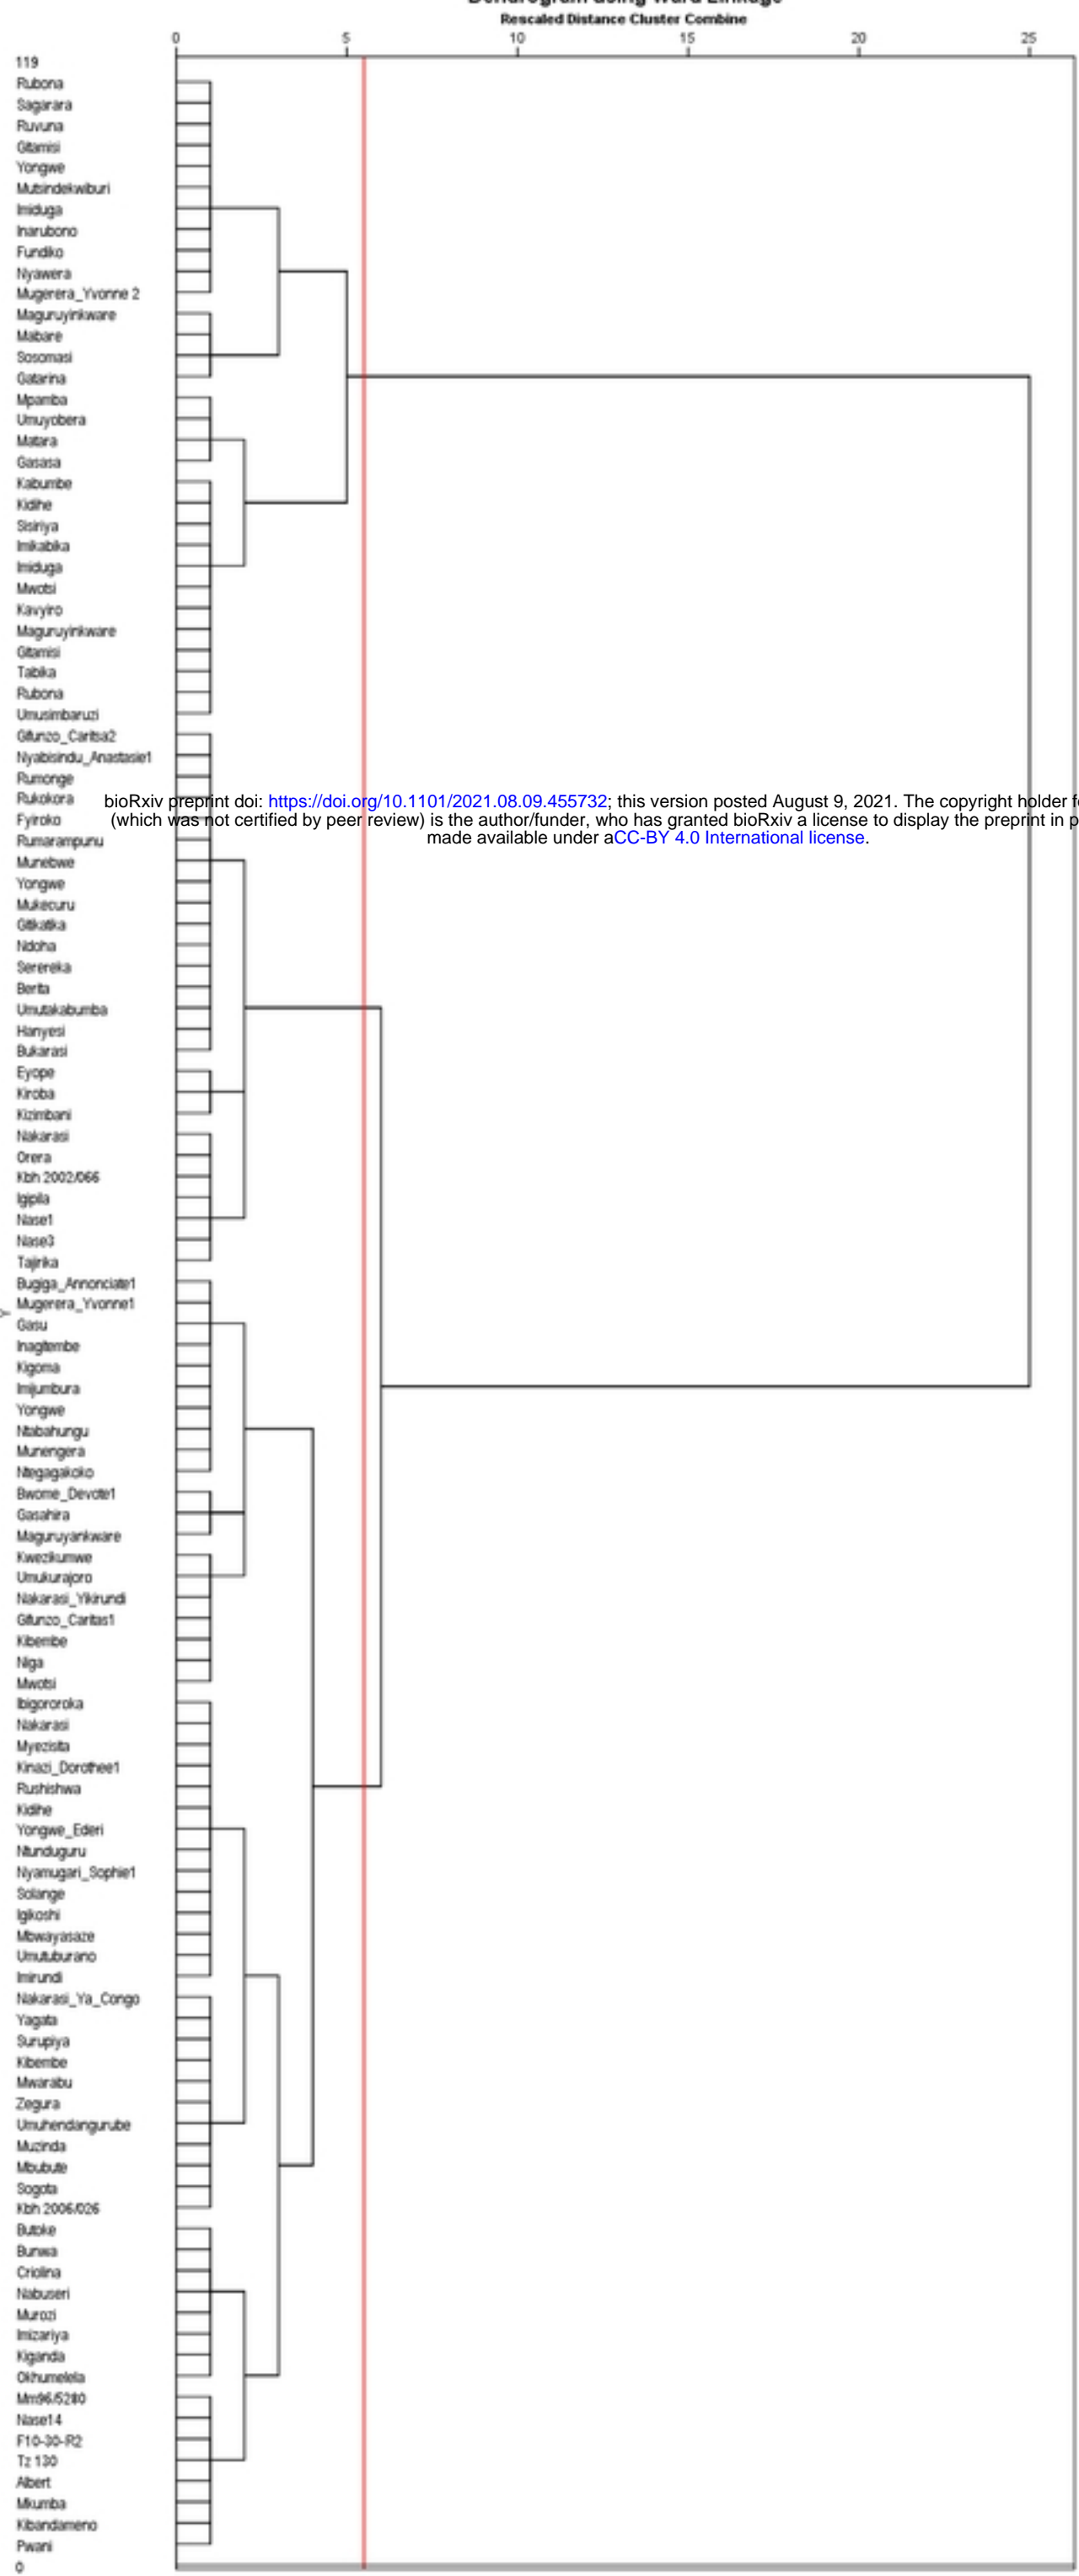

bioRxiv preprint doi: <https://doi.org/10.1101/2021.08.09.455732>; this version posted August 9, 2021. The copyright holder for this preprint (which was not certified by peer review) is the author/funder, who has granted bioRxiv a license to display the preprint in perpetuity. It is made available under aCC-BY 4.0 International license.

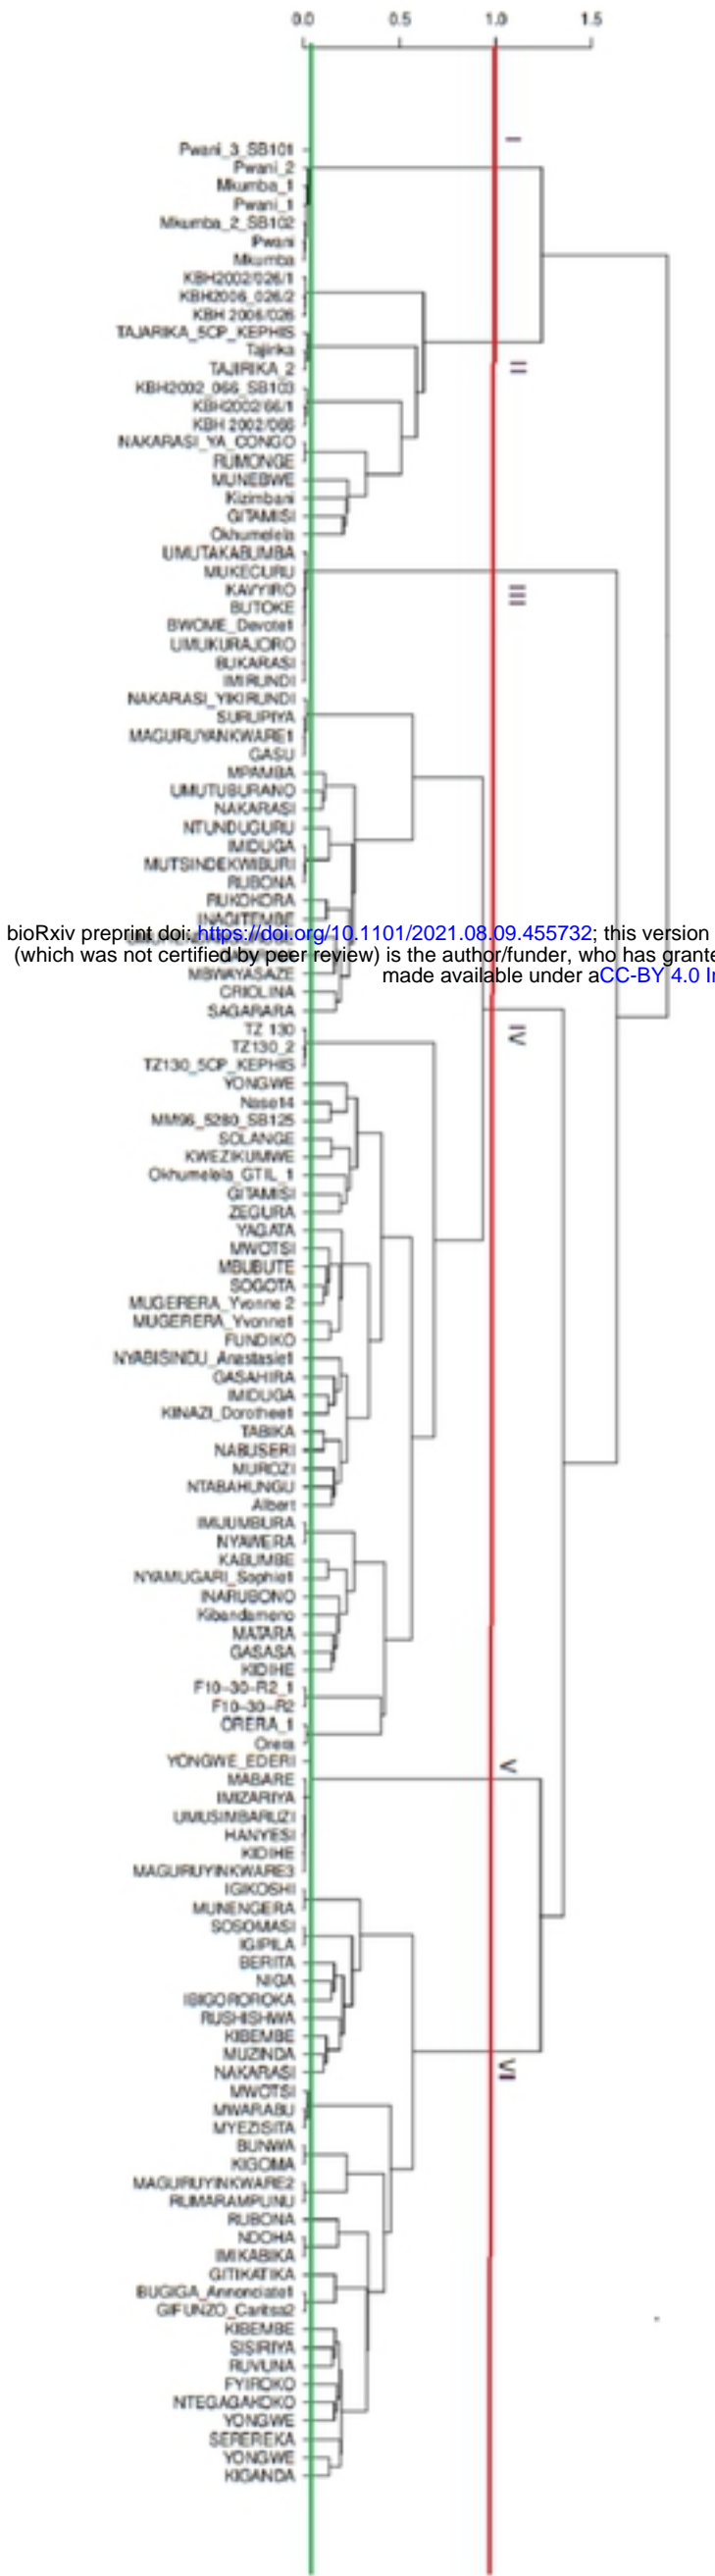

bioRxiv preprint doi: <https://doi.org/10.1101/2021.08.09.455732>; this version posted (which was not certified by peer review) is the author/funder, who has granted bioRxiv a license to display the preprint in perpetuity. It is made available under aCC-BY 4.0 International license.

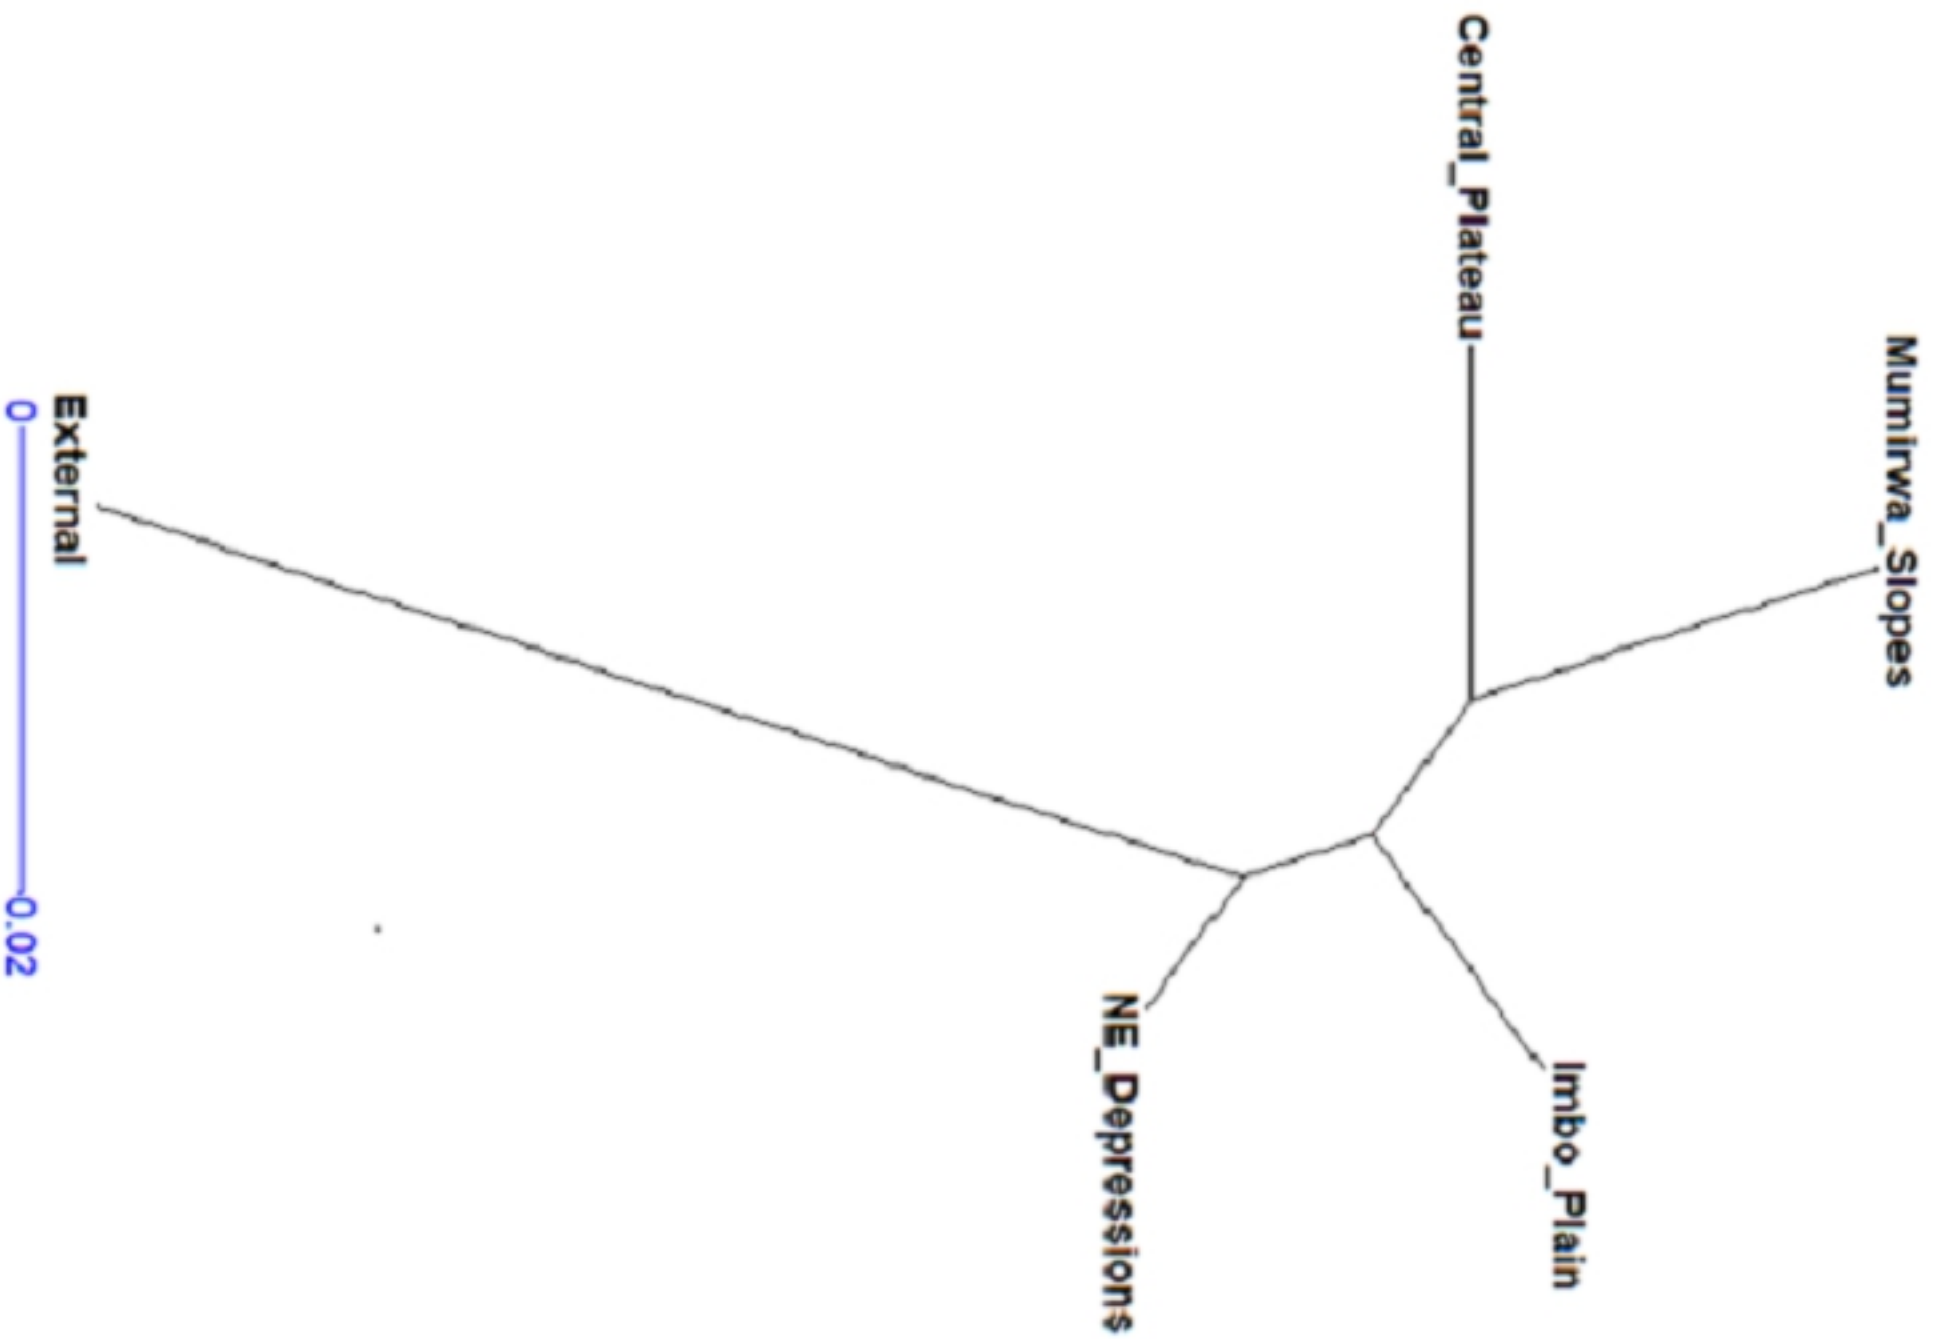

Source: http://biorxiv.org/content/10.1101/2021.08.09.455732v1.full.pdf
